# Supplementary material for: Spin-state switching: chemical modulation and the impact of intermolecular interactions in manganese(iii) complexes
Source: Royal Society of Chemistry journal article supplement (doi:10.1039/d3dt01707a), 2023-01-01
Supplement: d3dt01707a1.pdf [file d3dt01707a1.pdf]

# Spin-State Switching: Chemical Modulation and the Impact of Intermolecular Interactions in Manganese(III) Complexes

*Sukanya Bagchi,<sup>†</sup> Sujit Kamilya,<sup>†</sup> Sakshi Mehta,<sup>†</sup> Subhankar Mandal,<sup>†</sup> Arka Bandyopadhyay,<sup>†</sup>  
Awadhesh Narayan,<sup>†</sup> Subrata Ghosh,<sup>\*,†</sup> and Abhishake Mondal<sup>\*,†</sup>*

*<sup>†</sup>Solid State and Structural Chemistry Unit, Indian Institute of Science, Sir C V Raman Road,  
Bangalore 560012, India.*

Email: subratagchem@gmail.com; mondal@iisc.ac.in

## Table of Content:

|                                                                                                                                                                                     |    |
|-------------------------------------------------------------------------------------------------------------------------------------------------------------------------------------|----|
| Experimental Section.....                                                                                                                                                           | 6  |
| Materials and physical measurements.....                                                                                                                                            | 6  |
| Magnetic Measurements .....                                                                                                                                                         | 6  |
| X-ray crystallography .....                                                                                                                                                         | 7  |
| Figures .....                                                                                                                                                                       | 9  |
| Tables.....                                                                                                                                                                         | 43 |
| References.....                                                                                                                                                                     | 62 |
| <br>                                                                                                                                                                                |    |
| <b>Fig. S1.</b> Picture of crystals for complexes <b>1 – 5</b> (left to right). .....                                                                                               | 9  |
| <b>Fig. S2.</b> Comparison of the room temperature experimental PXRD pattern and the 296 K simulated one for <b>1</b> . .....                                                       | 9  |
| <b>Fig. S3.</b> Comparison of the room temperature experimental PXRD pattern and the 296 K simulated one for <b>2</b> . .....                                                       | 10 |
| <b>Fig. S4.</b> Comparison of the room temperature experimental PXRD pattern and the 296 K simulated one for <b>3</b> . .....                                                       | 11 |
| <b>Fig. S5.</b> Comparison of the room temperature experimental PXRD pattern and the 296 K simulated one for <b>4</b> . .....                                                       | 12 |
| <b>Fig. S6.</b> Comparison of the room temperature experimental PXRD pattern and the 296 K simulated one for <b>5</b> . .....                                                       | 13 |
| <b>Fig. S7.</b> Thermogravimetric analysis (TGA) for <b>1 – 5</b> from 303 K to 573 K temperature range at 10 K min <sup>-1</sup> sweep rate under N <sub>2</sub> atmosphere. ....  | 13 |
| <b>Fig. S8.</b> ATR IR spectra of <b>1 – 5</b> at room temperature.....                                                                                                             | 14 |
| <b>Fig. S9.</b> Perspective view of unit cell in <b>1</b> at 296 K. Hydrogen atoms are omitted for clarity (Mn: Purple, C: gray, N: blue, O: red, Cl: green, Re: teal blue). .....  | 15 |
| <b>Fig. S10.</b> Perspective view of unit cell in <b>1</b> at 120 K. Hydrogen atoms are omitted for clarity (Mn: Purple, C: gray, N: blue, O: red, Cl: green, Re: teal blue). ..... | 15 |
| <b>Fig. S11.</b> Perspective view of unit cell in <b>1</b> at 90 K. Hydrogen atoms are omitted for clarity (Mn: Purple, C: gray, N: blue, O: red, Cl: green; Re: teal blue). .....  | 15 |
| <b>Fig. S12.</b> Perspective view of unit cell in <b>2</b> at 296 K. Hydrogen atoms are omitted for clarity (Mn: Purple, C: gray, N: blue, O: red, Br: brown, Re: teal blue).....   | 16 |
| <b>Fig. S13.</b> Perspective view of unit cell in <b>2</b> at 120 K. Hydrogen atoms are omitted for clarity (Mn: Purple, C: gray, N: blue, O: red, Br: brown, Re: teal blue).....   | 16 |
| <b>Fig. S14.</b> Perspective view of unit cell in <b>3</b> at 296 K. Hydrogen atoms are omitted for clarity (Mn: Purple, C: gray, N: blue, O: red, Cl: green, Re: teal blue). ..... | 16 |
| <b>Fig. S15.</b> Perspective view of unit cell in <b>4</b> at 296 K. Hydrogen atoms are omitted for clarity (Mn: Purple, C: gray, N: blue, O: red, Br: brown, Re: teal blue).....   | 17 |
| <b>Fig. S16.</b> Perspective view of unit cell in <b>5</b> at 296 K. Hydrogen atoms are omitted for clarity (Mn: Purple, C: gray, N: blue, O: red, Re: teal blue). .....            | 17 |
| <b>Fig. S17.</b> Perspective view of unit cell in <b>5</b> at 120 K. Hydrogen atoms are omitted for clarity (Mn: Purple, C: gray, N: blue, O: red, Re: teal blue). .....            | 18 |

|                                                                                                                                                                                                                                                                                                                                                                               |    |
|-------------------------------------------------------------------------------------------------------------------------------------------------------------------------------------------------------------------------------------------------------------------------------------------------------------------------------------------------------------------------------|----|
| <b>Fig. S18.</b> Perspective view of a fragment of the supramolecular structure displaying several weak interactions (cyan lines) coming from $\text{ReO}_4^-$ counter anion (left) and Cl atoms (right) in <b>1</b> at 296 K.....                                                                                                                                            | 18 |
| <b>Fig. S19.</b> View of N–H $\cdots$ O interactions (cyan lines) forming 1D chain in <b>2</b> at 296 K.....                                                                                                                                                                                                                                                                  | 18 |
| <b>Fig. S20.</b> Perspective view of a fragment of the supramolecular structure displaying several weak interactions (cyan lines) coming from $\text{ReO}_4^-$ counter anion (left) and Br atom (right) in <b>2</b> at 296 K.....                                                                                                                                             | 19 |
| <b>Fig. S21.</b> Perspective view of a fragment of the supramolecular structure displaying several weak interactions (cyan lines) coming from Cl atom in <b>3</b> at 296 K.....                                                                                                                                                                                               | 19 |
| <b>Fig. S22.</b> View of N–H $\cdots$ O interactions (cyan lines) forming 1D chain in <b>4</b> at 296 K.....                                                                                                                                                                                                                                                                  | 20 |
| <b>Fig. S23.</b> Perspective view of a fragment of the supramolecular structure displaying several weak interactions (cyan lines) coming from $\text{ReO}_4^-$ counter anion (left) and Br atoms (right) in <b>4</b> at 296 K.....                                                                                                                                            | 20 |
| <b>Fig. S24.</b> View of N–H $\cdots$ O interactions (cyan lines) forming 1D chain in <b>5</b> at 296 K.....                                                                                                                                                                                                                                                                  | 20 |
| <b>Fig. S25.</b> Perspective view of a fragment of the supramolecular structure displaying several weak interactions (cyan lines) coming from $\text{ReO}_4^-$ counter anion (left) and $\text{NO}_2$ group (right) in <b>5</b> at 296 K....                                                                                                                                  | 21 |
| <b>Fig. S26.</b> Hirshfeld surface analysis of complexes <b>3</b> (left) and <b>4</b> (right), showing the $d_{\text{norm}}$ surfaces of the monocationic unit ( $[\text{Mn}(5\text{X-sal}_2\text{-323})]^+$ ) (top) and 2D fingerprint plots of O $\cdots$ H contact (bottom) at 296 K. ....                                                                                 | 22 |
| <b>Fig. S27.</b> Hirshfeld surface analysis of complexes <b>1 - 5</b> (left to right), showing 2D fingerprint plots of X $\cdots$ H contacts at 296 K.....                                                                                                                                                                                                                    | 22 |
| <b>Fig. S28.</b> Hirshfeld surface analysis of complexes <b>1, 2, and 5</b> (left to right), showing the $d_{\text{norm}}$ surfaces of the monocationic unit ( $[\text{Mn}(5\text{X-sal}_2\text{-323})]^+$ ) (top) and 2D fingerprint plots of O $\cdots$ H contact (middle) and X $\cdots$ H contact (bottom) at 90 K for <b>1</b> and 120 K for <b>2</b> and <b>5</b> ..... | 23 |
| <b>Fig. S29.</b> UV-vis-NIR spectra of <b>1 – 5</b> in MeCN with dilute (left) and concentrated (right) solutions at room temperature. ....                                                                                                                                                                                                                                   | 25 |
| <b>Fig. S30.</b> Solid state UV-vis-NIR spectra of <b>1 – 5</b> in KBr at room temperature. ....                                                                                                                                                                                                                                                                              | 25 |
| <b>Fig. S31.</b> Field dependence of the magnetization as $M$ vs $H$ plots for <b>1 - 5</b> at 100 K. The solid line is the best fit. ....                                                                                                                                                                                                                                    | 26 |
| <b>Fig. S32.</b> Temperature dependence of $\chi T$ product in log scale for <b>1 – 5</b> at 1000 Oe. ....                                                                                                                                                                                                                                                                    | 27 |
| <b>Fig. S33.</b> Temperature dependence of $\chi T$ product for <b>1</b> at 1000 Oe in cooling and heating mode. ....                                                                                                                                                                                                                                                         | 27 |
| <b>Fig. S34.</b> Temperature dependence of $\chi T$ product for <b>2</b> at 1000 Oe in cooling and heating mode. ....                                                                                                                                                                                                                                                         | 28 |
| <b>Fig. S35.</b> Temperature dependence of $\chi T$ product for <b>3</b> at 1000 Oe in cooling and heating mode. ....                                                                                                                                                                                                                                                         | 28 |
| <b>Fig. S36.</b> Temperature dependence of $\chi T$ product for <b>4</b> at 1000 Oe in cooling and heating mode. ....                                                                                                                                                                                                                                                         | 29 |
| <b>Fig. S37.</b> Temperature dependence of $\chi T$ product for <b>5</b> at 1000 Oe in cooling and heating mode. ....                                                                                                                                                                                                                                                         | 29 |
| <b>Fig. S38.</b> The first derivative of $\chi T$ against the temperature, $d\chi T / dT$ vs. T, identifies $T_{1/2} = 147$ K for <b>1.30</b>                                                                                                                                                                                                                                 |    |
| <b>Fig. S39.</b> The first derivative of $\chi T$ against the temperature, $d\chi T / dT$ vs. T, identifies $T_{1/2} = 96$ K for <b>2.30</b>                                                                                                                                                                                                                                  |    |
| <b>Fig. S40.</b> The first derivative of $\chi T$ against the temperature, $d\chi T / dT$ vs. T, identifies $T_{1/2} = 104$ K for <b>3.31</b>                                                                                                                                                                                                                                 |    |
| <b>Fig. S41.</b> The first derivative of $\chi T$ against the temperature, $d\chi T / dT$ vs. T, identifies $T_{1/2} = 115$ K for <b>5.31</b>                                                                                                                                                                                                                                 |    |
| <b>Fig. S42</b> Fitting of $\chi T$ vs T data of <b>1</b> using the ideal solution model.....                                                                                                                                                                                                                                                                                 | 33 |
| <b>Fig. S43</b> Fitting of $\chi T$ vs T data of <b>2</b> using the ideal solution model.....                                                                                                                                                                                                                                                                                 | 33 |
| <b>Fig. S44</b> Fitting of $\chi T$ vs T data of <b>4</b> using the ideal solution model.....                                                                                                                                                                                                                                                                                 | 34 |
| <b>Fig. S45</b> Fitting of $\chi T$ vs T data of <b>5</b> using the ideal solution model.....                                                                                                                                                                                                                                                                                 | 34 |
| <b>Fig. S46.</b> Field dependence of the magnetization as $M$ vs $H$ (left) and $M$ vs $H/T$ (right) plots for <b>1</b> at 2, 5 and 6 K. The solid lines are guide for the eyes. ....                                                                                                                                                                                         | 35 |

|                                                                                                                                                                                                                                                                                                                                                                                                                                                                                                                                 |    |
|---------------------------------------------------------------------------------------------------------------------------------------------------------------------------------------------------------------------------------------------------------------------------------------------------------------------------------------------------------------------------------------------------------------------------------------------------------------------------------------------------------------------------------|----|
| <b>Fig. S47.</b> Field dependence of the magnetization as $M$ vs $H$ (left) and $M$ vs $H/T$ (right) plots for <b>2</b> at 2, 5 and 6 K. The solid lines are guide for the eyes. ....                                                                                                                                                                                                                                                                                                                                           | 35 |
| <b>Fig. S48.</b> Field dependence of the magnetization as $M$ vs $H$ (left) and $M$ vs $H/T$ (right) plots for <b>3</b> at 2, 5 and 6 K. The solid lines are guide for the eyes. ....                                                                                                                                                                                                                                                                                                                                           | 36 |
| <b>Fig. S49.</b> Field dependence of the magnetization as $M$ vs $H$ (left) and $M$ vs $H/T$ (right) plots for <b>4</b> at 2, 5 and 6 K. The solid lines are guide for the eyes. ....                                                                                                                                                                                                                                                                                                                                           | 36 |
| <b>Fig. S50.</b> Field dependence of the magnetization as $M$ vs $H$ (left) and $M$ vs $H/T$ (right) plots for <b>5</b> at 2, 5 and 6 K. The solid lines are guide for the eyes. ....                                                                                                                                                                                                                                                                                                                                           | 37 |
| <b>Fig. S51.</b> Top: Cyclic voltammograms of <b>1 – 5</b> in 0.2 M ( ${}^n\text{Bu}_4\text{N}$ )PF <sub>6</sub> / MeCN with scan rate of 100 mV/s. Arrow indicates the direction of the potential sweep. Bottom: Zoom in section of the Cyclic voltammograms; reduction (left) and oxidation (right). ....                                                                                                                                                                                                                     | 38 |
| <b>Fig. S52.</b> Cyclic voltammograms for reduction (left) and oxidation (right) of <b>1</b> in 0.2 M ( ${}^n\text{Bu}_4\text{N}$ )PF <sub>6</sub> / MeCN with different scan rate. Arrow indicates the direction of the potential sweep. ....                                                                                                                                                                                                                                                                                  | 39 |
| <b>Fig. S53.</b> Cyclic voltammograms for reduction (left) and oxidation (right) of <b>2</b> in 0.2 M ( ${}^n\text{Bu}_4\text{N}$ )PF <sub>6</sub> / MeCN with different scan rate. Arrow indicates the direction of the potential sweep. ....                                                                                                                                                                                                                                                                                  | 39 |
| <b>Fig. S54.</b> Cyclic voltammograms for reduction (left) and oxidation (right) of <b>3</b> in 0.2 M ( ${}^n\text{Bu}_4\text{N}$ )PF <sub>6</sub> / MeCN with different scan rate. Arrow indicates the direction of the potential sweep. ....                                                                                                                                                                                                                                                                                  | 40 |
| <b>Fig. S55.</b> Cyclic voltammograms for reduction (left) and oxidation (right) of <b>4</b> in 0.2 M ( ${}^n\text{Bu}_4\text{N}$ )PF <sub>6</sub> / MeCN with different scan rate. Arrow indicates the direction of the potential sweep. ....                                                                                                                                                                                                                                                                                  | 40 |
| <b>Fig. S56.</b> Cyclic voltammograms for reduction (left) and oxidation (right) of <b>5</b> in 0.2 M ( ${}^n\text{Bu}_4\text{N}$ )PF <sub>6</sub> / MeCN with different scan rate. Arrow indicates the open circuit potential with the direction of the potential sweep. ....                                                                                                                                                                                                                                                  | 41 |
| <b>Fig. S57.</b> Solution-state spectroelectrochemistry of <b>1</b> in 0.2 M ( ${}^n\text{Bu}_4\text{N}$ )PF <sub>6</sub> / MeCN over the potential range of 0.0 V to -0.65 V vs Fc/Fc <sup>+</sup> . Arrows indicate the change in absorbance with the application of potential. ....                                                                                                                                                                                                                                          | 41 |
| <b>Fig. S58.</b> Plot of T (SCO) vs Hammett $\sigma_p$ , $E_{1/2}$ [Mn(III)/Mn(II)] vs Hammett $\sigma_p$ , and $E_{1/2}$ [Mn(IV)/Mn(III)] vs Hammett $\sigma_p$ for complexes <b>1</b> (5Cl), <b>2</b> (5Br), and <b>5</b> (5 NO <sub>2</sub> ). ....                                                                                                                                                                                                                                                                          | 42 |
| <b>Fig. S59.</b> The energy cost of the manganese (III) systems at different temperatures to be in spin states with multiplicity 1, 3, and 5. The triplet (spin multiplicity = 3) and quintet (spin multiplicity = 5) states are more favourable among different spin states. Temperature switches the systems from one of these two spin states to another. The preferred spin states of the systems at different temperatures are shown by the zero reference energy values, which agree well with experimental results. .... | 42 |
| <b>Table S1.</b> X-ray crystallography data for complexes <b>1 – 3</b> . ....                                                                                                                                                                                                                                                                                                                                                                                                                                                   | 43 |
| <b>Table S2</b> X-ray crystallography data for complexes <b>4</b> and <b>5</b> . ....                                                                                                                                                                                                                                                                                                                                                                                                                                           | 44 |
| <b>Table S3.</b> Selected bond distances (Å) and bond angles (°) in <b>1</b> and <b>2</b> . ....                                                                                                                                                                                                                                                                                                                                                                                                                                | 45 |
| <b>Table S4.</b> Selected bond distances (Å) and bond angles (°) in <b>3</b> at 296 K. ....                                                                                                                                                                                                                                                                                                                                                                                                                                     | 46 |
| <b>Table S5.</b> Selected bond distances (Å) and bond angles (°) in <b>4</b> and <b>5</b> . ....                                                                                                                                                                                                                                                                                                                                                                                                                                | 47 |
| <b>Table S6:</b> CShM analysis data for complexes <b>1 – 5</b> . ....                                                                                                                                                                                                                                                                                                                                                                                                                                                           | 48 |
| <b>Table S7</b> Selected Non-covalent cation-anion interactions parameters for <b>1</b> and <b>2</b> . ....                                                                                                                                                                                                                                                                                                                                                                                                                     | 49 |
| <b>Table S8</b> Selected Non-covalent cation-anion interactions parameters for <b>3</b> . ....                                                                                                                                                                                                                                                                                                                                                                                                                                  | 49 |
| <b>Table S9</b> Selected Non-covalent cation-anion interactions parameters for <b>4</b> . ....                                                                                                                                                                                                                                                                                                                                                                                                                                  | 49 |
| <b>Table S10</b> Selected Non-covalent cation-anion interactions parameters for <b>5</b> . ....                                                                                                                                                                                                                                                                                                                                                                                                                                 | 49 |
| <b>Table S11</b> The energy difference between different spin states of the manganese(III) complexes at various temperature. The preferred spin states are obtained from the lowest energy. ....                                                                                                                                                                                                                                                                                                                                | 50 |

|                                                                                                                                                                            |    |
|----------------------------------------------------------------------------------------------------------------------------------------------------------------------------|----|
| <b>Table S12:</b> Spin crossover behaviors of [Mn(5Cl-sal <sub>2</sub> -323)](Y) (Y = counter anion) complexes with associated Mn–N/O bond distances .....                 | 51 |
| <b>Table S13:</b> Spin crossover behaviors of [Mn(5Br-sal <sub>2</sub> -323)](Y) (Y = counter anion) complexes with associated Mn–N/O bond distances .....                 | 53 |
| <b>Table S14:</b> Spin crossover behaviors of [Mn(3,5Cl-sal <sub>2</sub> -323)](Y) (Y = counter anion) complexes with associated Mn–N/O bond distances .....               | 55 |
| <b>Table S15:</b> Spin crossover behaviors of [Mn(3,5Br-sal <sub>2</sub> -323)](Y) (Y = counter anion) complexes with associated Mn–N/O bond distances .....               | 57 |
| <b>Table S16:</b> Spin crossover behaviors of [Mn(5NO <sub>2</sub> -sal <sub>2</sub> -323)](Y) (Y = counter anion) complexes with associated Mn–N/O bond distances .....   | 59 |
| <b>Table S17:</b> Spin crossover behaviors of [Mn(X-sal <sub>2</sub> -323)]ReO <sub>4</sub> (X= ligand substituents) complexes with associated Mn–N/O bond distances ..... | 61 |

## **Experimental Section**

### **Materials and physical measurements**

All manipulations were carried out under air unless otherwise stated. Solvents were dried by standard methods and freshly distilled before use. All chemicals were used as purchased from chemical sources without further purification. The crystals of complexes were removed from the mother liquor and dried on filter paper to remove any adhering solvent molecules, prior to measurement. The elemental analyses of C, H and N were performed with Thermo Scientific Flash 2000 Organic Elemental Analyzer. Infrared (IR) spectra were recorded in the range of 4000 – 500  $\text{cm}^{-1}$  on the Perkin Elmer spectrometer. UV-vis-NIR spectra were carried out in the region of 250 – 2000 nm on a Lambda 1050+ UV-vis-NIR spectrometer. The UV-vis spectroscopic measurements in solution were performed in quartz cuvettes with path length of 1 cm. Solid-state measurements were carried out by taking 5% sample by weight in KBr. Thermogravimetric analysis (TGA) was done on a Mettler Toledo TGA/SDTA851 analyzer with a heating rate of 10  $\text{K min}^{-1}$  under a nitrogen atmosphere ranging from 300 K to 573 K. Differential scanning calorimetry (DSC) measurements were performed using Mettler Toledo DSC 823° differential scanning calorimeter with a scan rate of 10  $\text{K min}^{-1}$  and 5  $\text{K min}^{-1}$  in a nitrogen atmosphere. Powder X-ray diffraction (PXRD) measurements were carried out on a PANalytical Empyrean diffractometer at 45 kV and 30 mA, under  $\text{Cu-K}\alpha$  radiation ( $\lambda = 1.54059 \text{ \AA}$ ). PXRD data analyses were done using PANalytical X'Pert HighScore Plus software.<sup>1</sup> Electrochemistry experiments were performed with a Metrohm Autolab PGSTAT101 using platinum as working electrode in acetonitrile with 0.2 M ( $n\text{Bu}_4$ )NPF<sub>6</sub> as supporting electrolyte. Ferrocene was used as an internal reference.

### **Magnetic Measurements**

The magnetic susceptibility measurements were carried out with Quantum Design MPMS-XL EverCool SQUID magnetometer, between 2 and 300 K for dc applied fields ranging from -5 T to

5 T for **1 - 5**. Polycrystalline samples of **1 - 5** (17.24, 19.66, 20.09, 22.50, and 23.46 mg, respectively) introduced in a polyethylene bag ( $2.8 \times 0.75 \times 0.02$  cm) were subjected to measurements. The temperature dependent data were measured using 1000 Oe dc fields. The isothermal magnetization data were acquired at 2, 5 and 6 K.  $M$  vs  $H$  measurements were performed at 100 K to check for the presence of ferromagnetic impurities which were found to be absent. The magnetic data were corrected for the sample holder and the diamagnetic contribution.

### **X-ray crystallography**

Single-crystal X-ray diffraction studies of complexes **1 - 5** were performed with a Bruker SMART APEX CCD diffractometer equipped with graphite-monochromated Mo  $K\alpha$  radiation ( $\lambda = 0.71073$  Å). The single crystal was mounted on a crystal mounting loop with the help of Paratone oil at 296 K and slowly cooled down to the measured temperature with a 2 K/min ramping rate using a liquid nitrogen gas-stream cooling device, followed by data collection at respective temperatures. Data integration and reduction were carried out using SAINT software, and empirical absorption corrections were performed using the SADABS program.<sup>2</sup> Structures were solved using direct methods and refined with a full-matrix least-squares method on  $F^2$  using SHELXL-2018 included in OLEX 2 version 1.3.0.<sup>3</sup> The disordered water molecule present in the crystal structure of complex **4** was masked by using SOLVENT MASK procedure in OLEX 2 which is equivalent to SQUEEZE in PLATON. The void space ( $55$  Å<sup>3</sup>) and number of electrons (11) confirm the presence of one water molecule per asymmetric unit which accounts for four water molecules per unit cell. The packing diagrams were made using Mercury 4.2.0.<sup>4</sup>

All other non-hydrogen atoms of complexes **1 - 5** were refined anisotropically and hydrogen atoms were labeled to ideal positions and refined isotropically using a riding model. CCDC 2238253 – 2238257 and 2238260 - 2238263 contain the supplementary crystallographic data for

this paper. These data can be obtained free of charge from The Cambridge Crystallographic Data Centre via [www.ccdc.cam.ac.uk/data\\_request/cif](http://www.ccdc.cam.ac.uk/data_request/cif).



## Figures

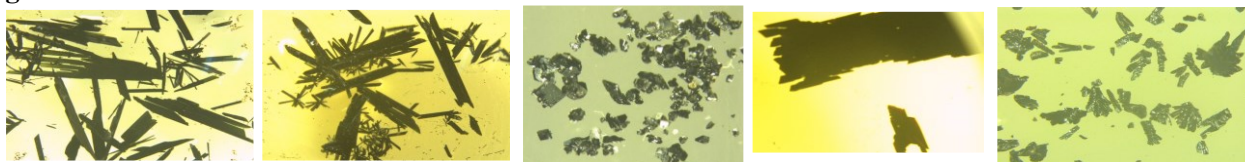

**Fig. S1.** Picture of crystals for complexes **1** – **5** (left to right).

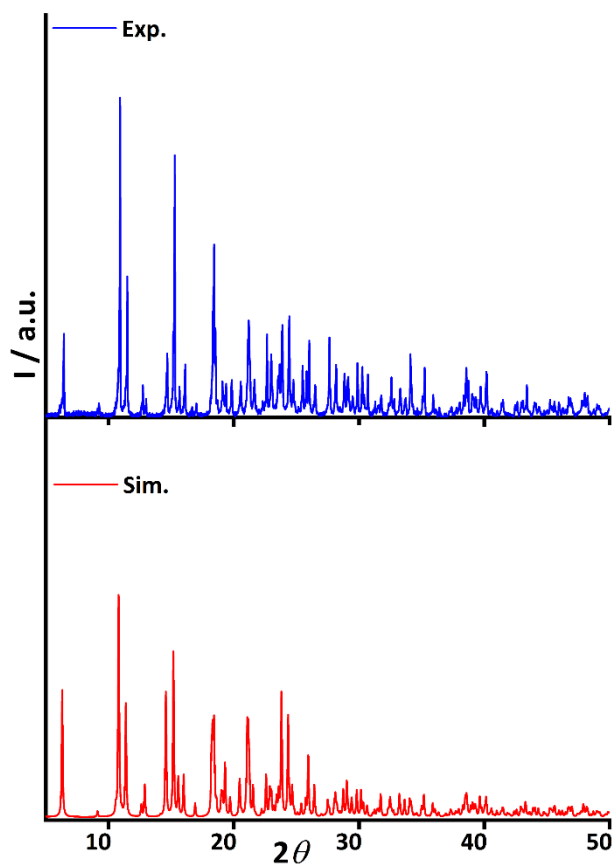

**Fig. S2.** Comparison of the room temperature experimental PXRD pattern and the 296 K simulated one for **1**.

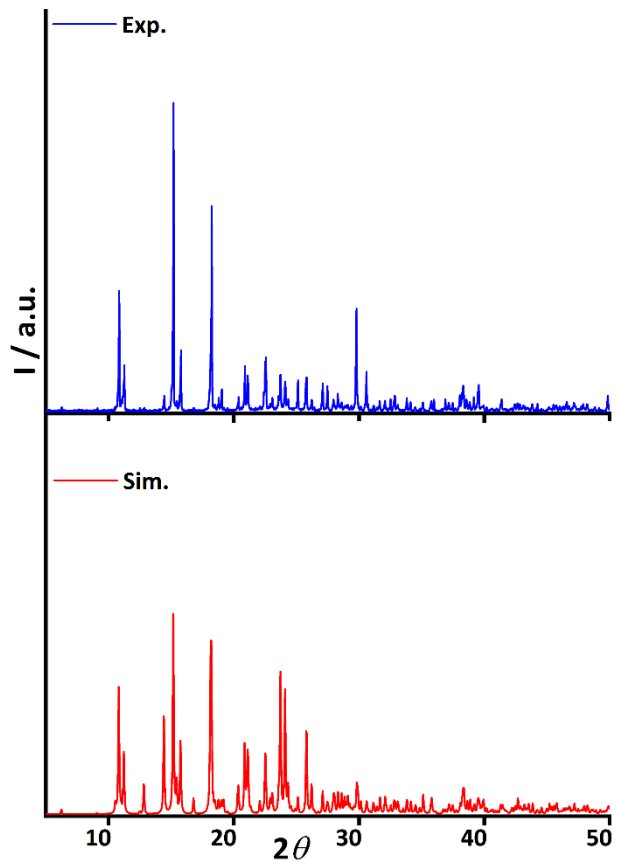

**Fig. S3.** Comparison of the room temperature experimental PXRD pattern and the 296 K simulated one for **2**.

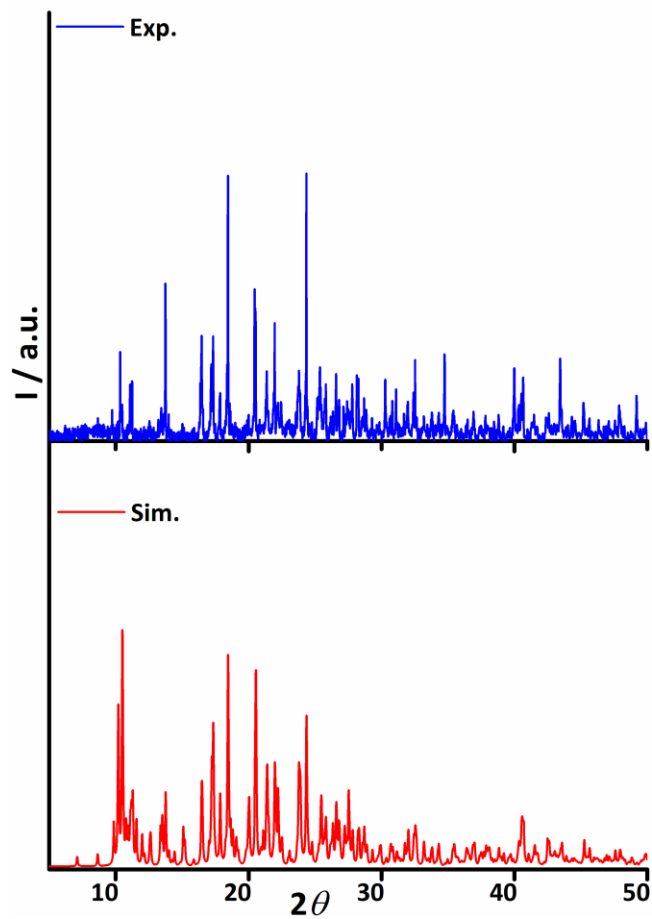

**Fig. S4.** Comparison of the room temperature experimental PXRD pattern and the 296 K simulated one for **3**.

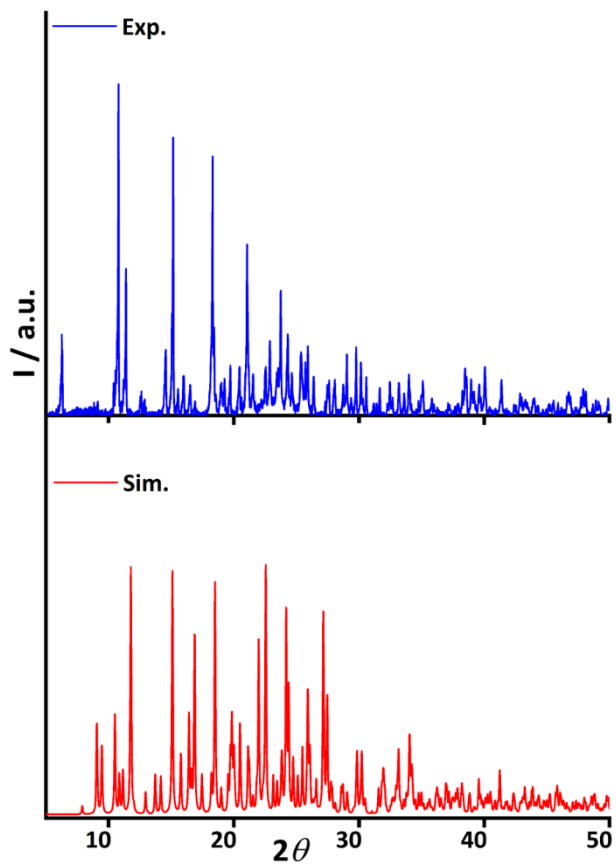

**Fig. S5.** Comparison of the room temperature experimental PXRD pattern and the 296 K simulated one for **4**.

The reason for the slight deviation in the experimental PXRD data for complex **4** is probably due to the partial solvent loss during the sample preparation for the PXRD measurement at room temperature.

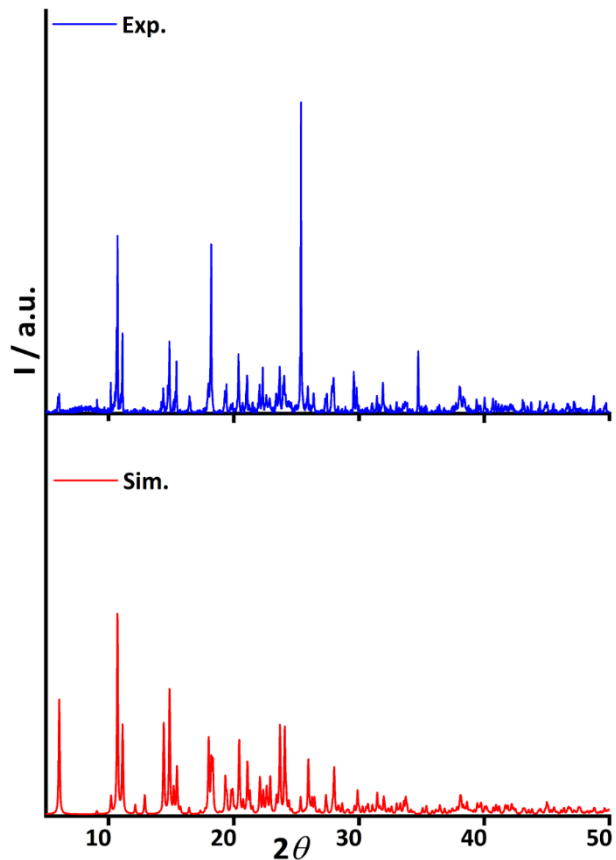

**Fig. S6.** Comparison of the room temperature experimental PXRD pattern and the 296 K simulated one for **5**.

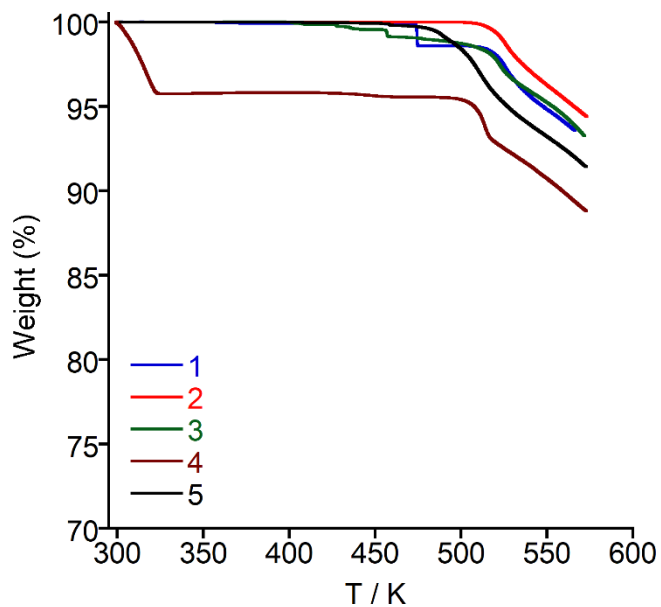

**Fig. S7.** Thermogravimetric analysis (TGA) for **1** – **5** from 303 K to 573 K temperature range at 10 K  $\text{min}^{-1}$  sweep rate under  $\text{N}_2$  atmosphere.

Complexes **1** – **5** were characterized fully by solid-state IR spectroscopy at room temperature (Fig. S8). The IR spectra display the characteristic C=N and N–H stretching vibrations of coordinated Schiff-base ligand at around 1620 – 1625  $\text{cm}^{-1}$  and 3225 – 3240  $\text{cm}^{-1}$  respectively while the bands around 915 and 850  $\text{cm}^{-1}$  suggested the presence of  $\text{ReO}_4^-$  anion in all these complexes. In addition, IR spectra show typical absorption of the coordinated Schiff-base ligands at around 1595, 1540, 1460, 1423, 1370, 1280, 1072, 1048, 860, 705 and 560  $\text{cm}^{-1}$ .

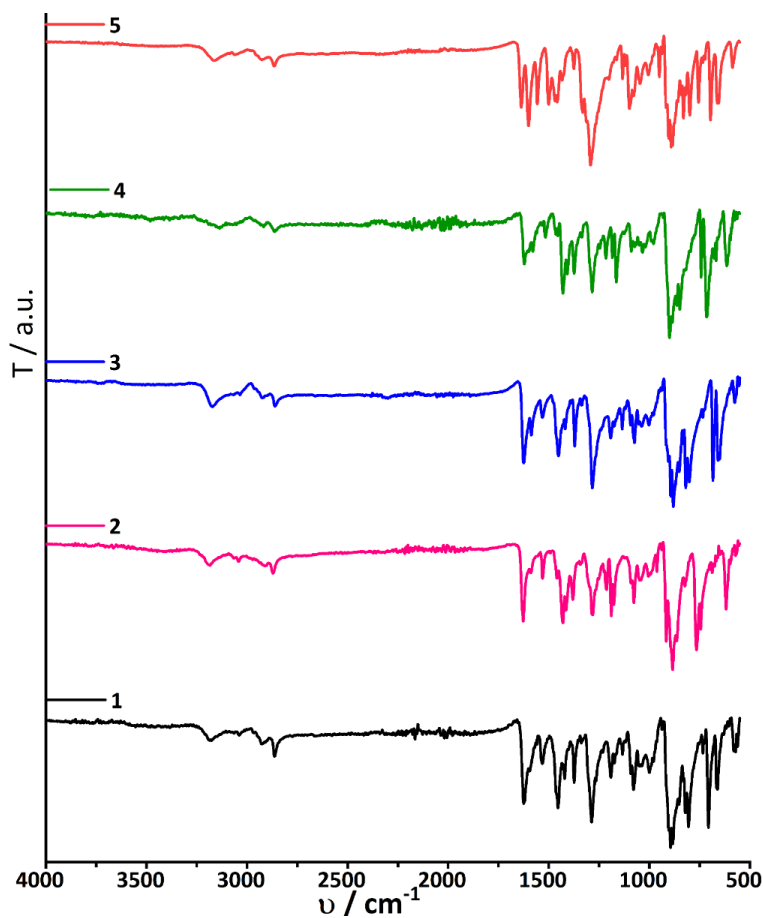

**Fig. S8.** ATR IR spectra of **1** – **5** at room temperature.

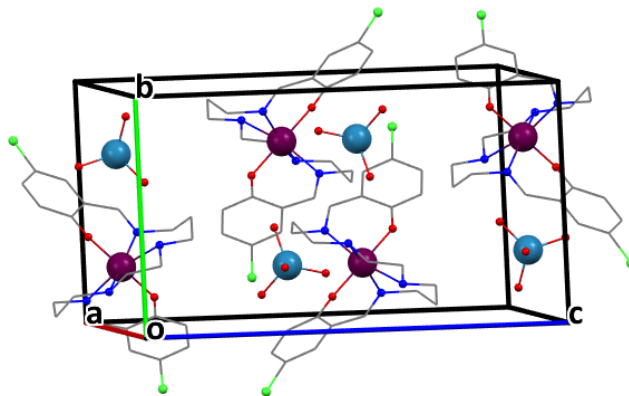

**Fig. S9.** Perspective view of unit cell in **1** at 296 K. Hydrogen atoms are omitted for clarity (Mn: Purple, C: gray, N: blue, O: red, Cl: green, Re: teal blue).

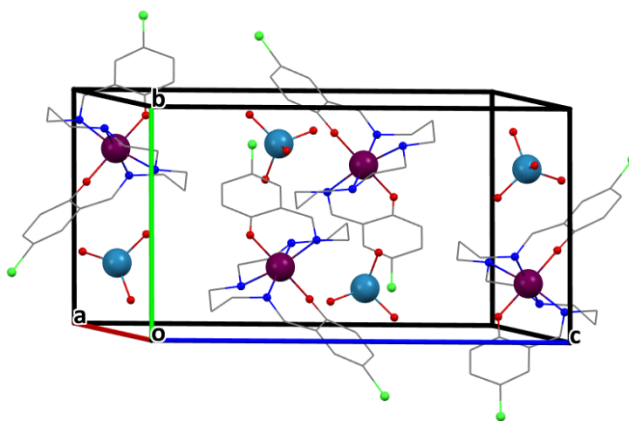

**Fig. S10.** Perspective view of unit cell in **1** at 120 K. Hydrogen atoms are omitted for clarity (Mn: Purple, C: gray, N: blue, O: red, Cl: green, Re: teal blue).

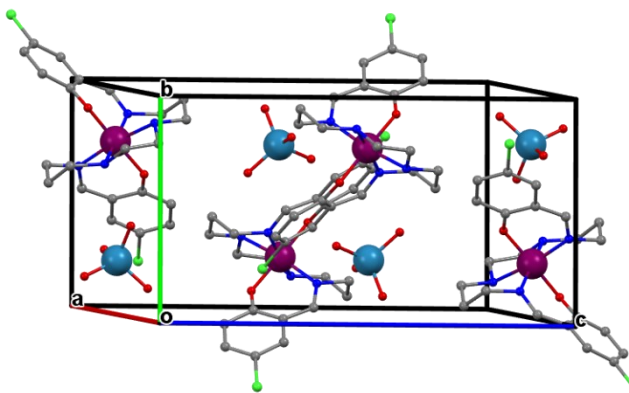

**Fig. S11.** Perspective view of unit cell in **1** at 90 K. Hydrogen atoms are omitted for clarity (Mn: Purple, C: gray, N: blue, O: red, Cl: green; Re: teal blue).

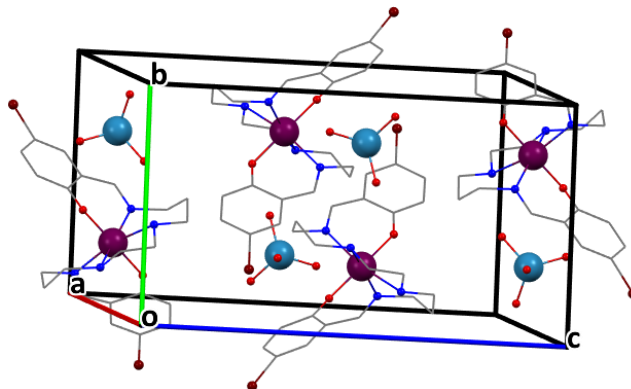

**Fig. S12.** Perspective view of unit cell in **2** at 296 K. Hydrogen atoms are omitted for clarity (Mn: Purple, C: gray, N: blue, O: red, Br: brown, Re: teal blue).

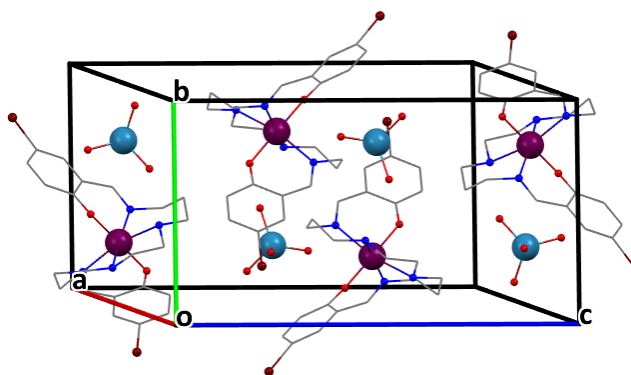

**Fig. S13.** Perspective view of unit cell in **2** at 120 K. Hydrogen atoms are omitted for clarity (Mn: Purple, C: gray, N: blue, O: red, Br: brown, Re: teal blue).

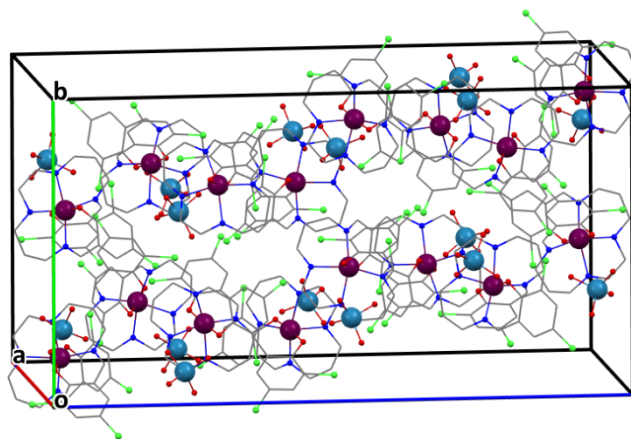

**Fig. S14.** Perspective view of unit cell in **3** at 296 K. Hydrogen atoms are omitted for clarity (Mn: Purple, C: gray, N: blue, O: red, Cl: green, Re: teal blue).



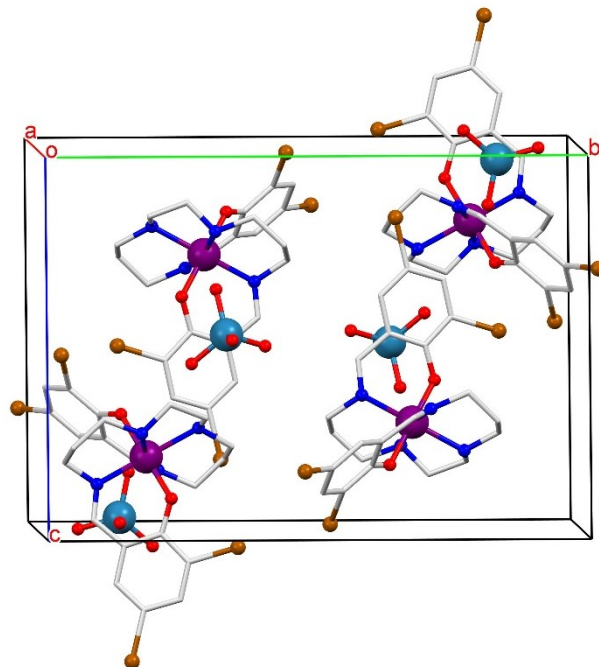

**Fig. S15.** Perspective view of unit cell in **4** at 296 K. Hydrogen atoms are omitted for clarity (Mn: Purple, C: gray, N: blue, O: red, Br: brown, Re: teal blue).

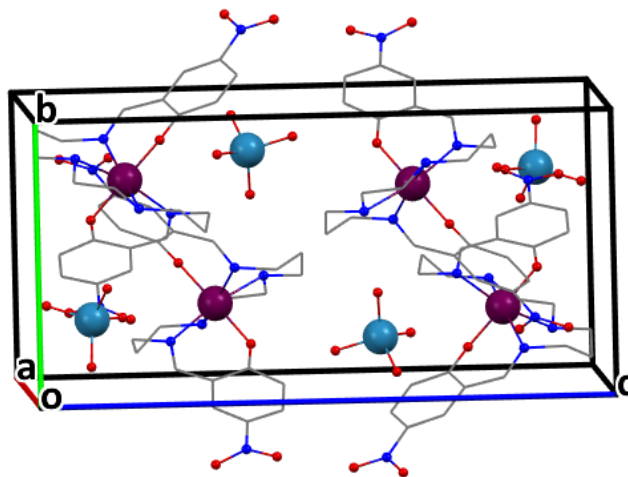

**Fig. S16.** Perspective view of unit cell in **5** at 296 K. Hydrogen atoms are omitted for clarity (Mn: Purple, C: gray, N: blue, O: red, Re: teal blue).

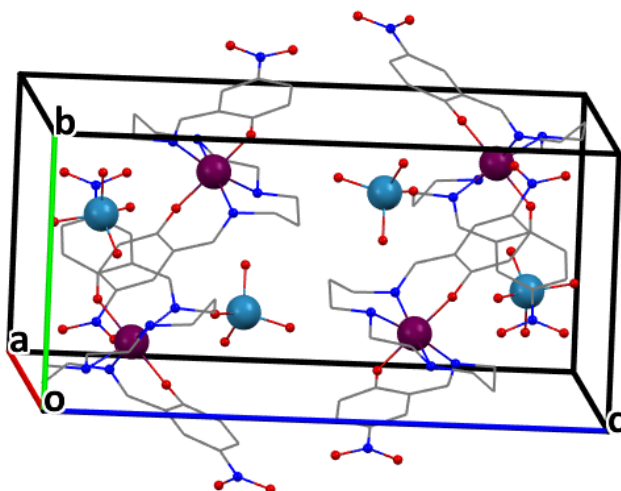

**Fig. S17.** Perspective view of unit cell in **5** at 120 K. Hydrogen atoms are omitted for clarity (Mn: Purple, C: gray, N: blue, O: red, Re: teal blue).

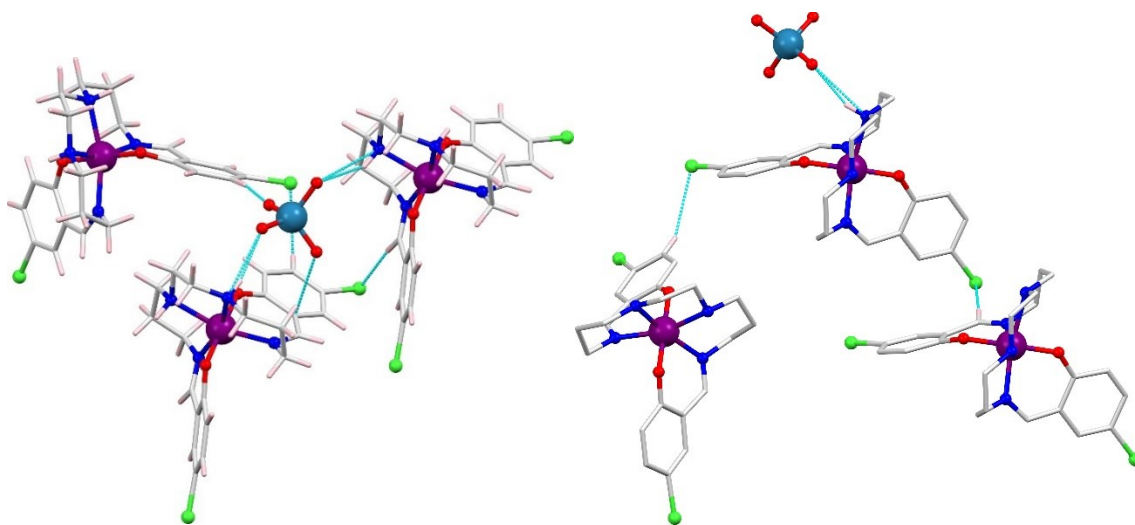

**Fig. S18.** Perspective view of a fragment of the supramolecular structure displaying several weak interactions (cyan lines) coming from  $\text{ReO}_4^-$  counter anion (left) and Cl atoms (right) in **1** at 296 K.

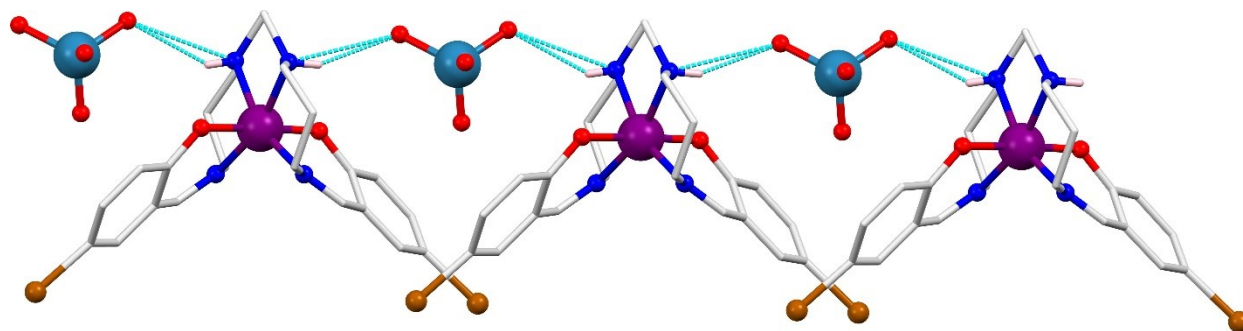

**Fig. S19.** View of  $\text{N-H}\cdots\text{O}$  interactions (cyan lines) forming 1D chain in **2** at 296 K.

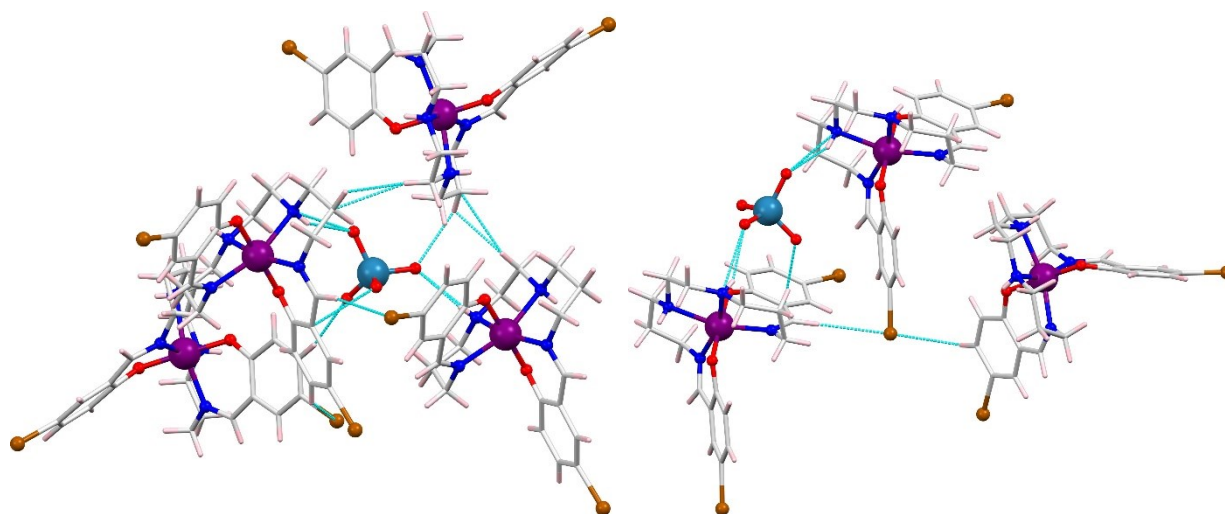

**Fig. S20.** Perspective view of a fragment of the supramolecular structure displaying several weak interactions (cyan lines) coming from  $\text{ReO}_4^-$  counter anion (left) and Br atom (right) in **2** at 296 K.

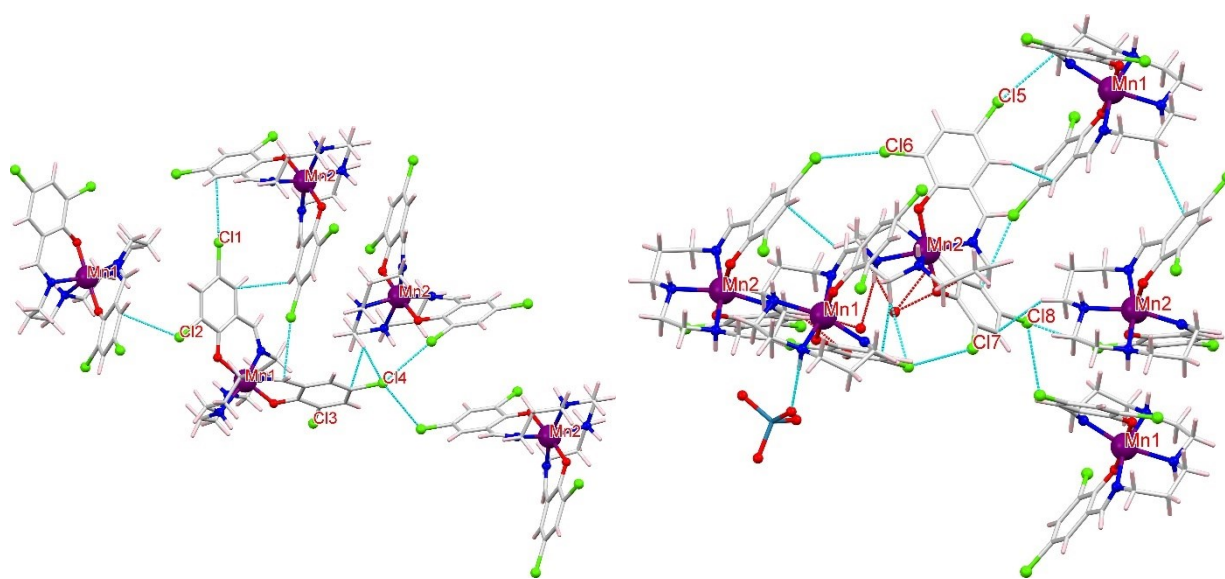

**Fig. S21.** Perspective view of a fragment of the supramolecular structure displaying several weak interactions (cyan lines) coming from Cl atom in **3** at 296 K.

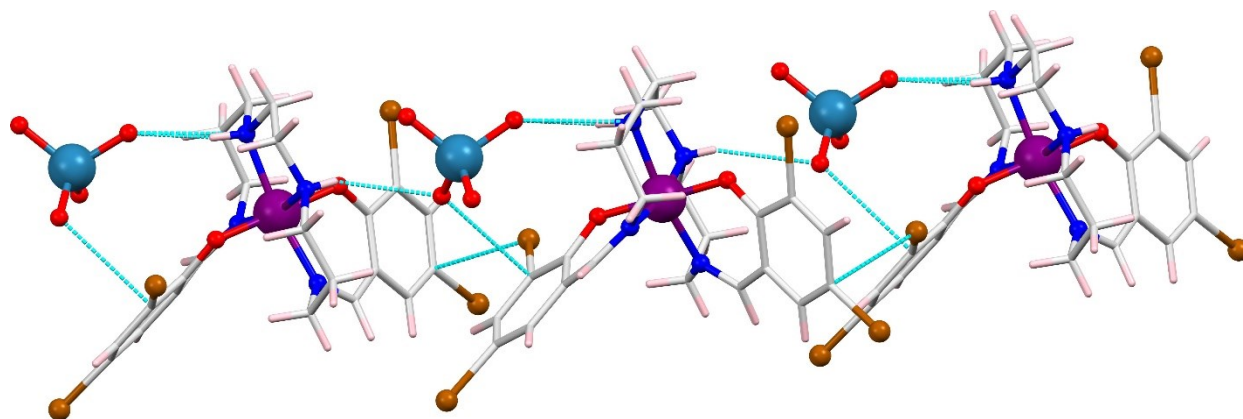

**Fig. S22.** View of N–H···O interactions (cyan lines) forming 1D chain in **4** at 296 K.

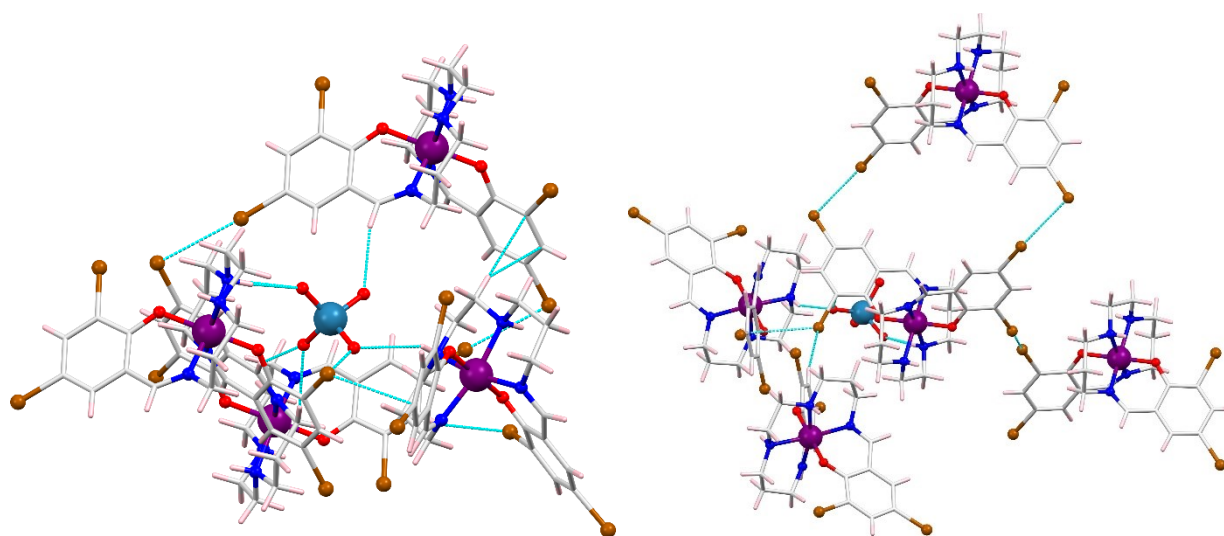

**Fig. S23.** Perspective view of a fragment of the supramolecular structure displaying several weak interactions (cyan lines) coming from ReO<sub>4</sub><sup>-</sup> counter anion (left) and Br atoms (right) in **4** at 296 K.

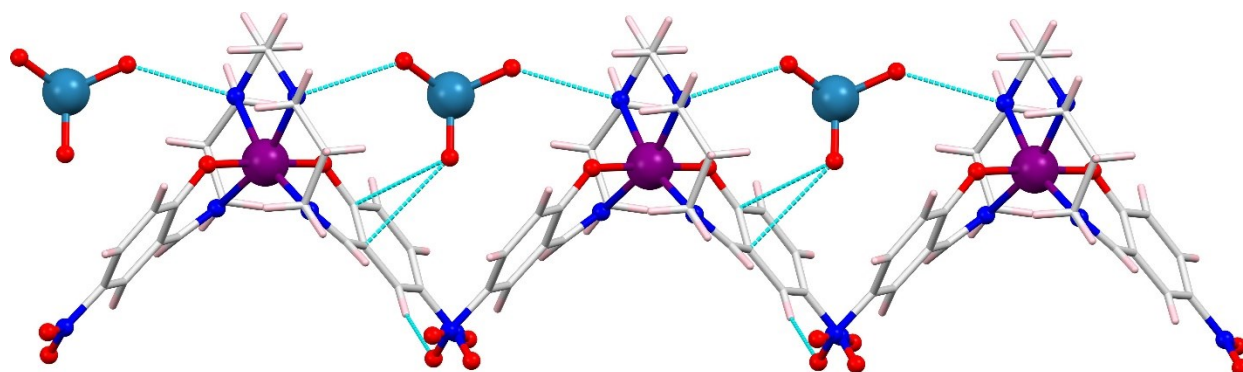

**Fig. S24.** View of N–H···O interactions (cyan lines) forming 1D chain in **5** at 296 K.

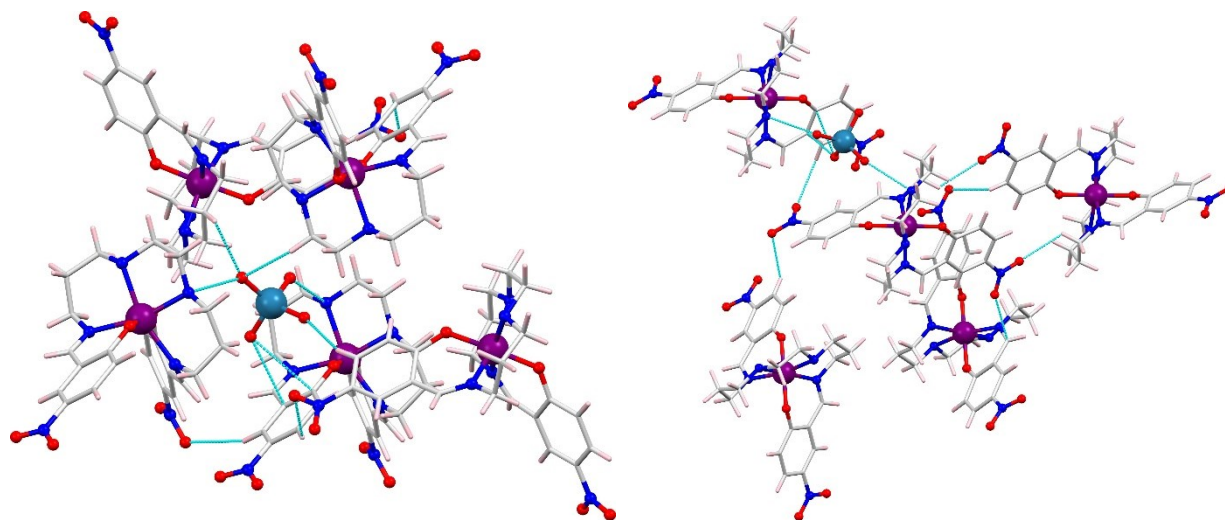

**Fig. S25.** Perspective view of a fragment of the supramolecular structure displaying several weak interactions (cyan lines) coming from  $\text{ReO}_4^-$  counter anion (left) and  $\text{NO}_2$  group (right) in **5** at 296 K.

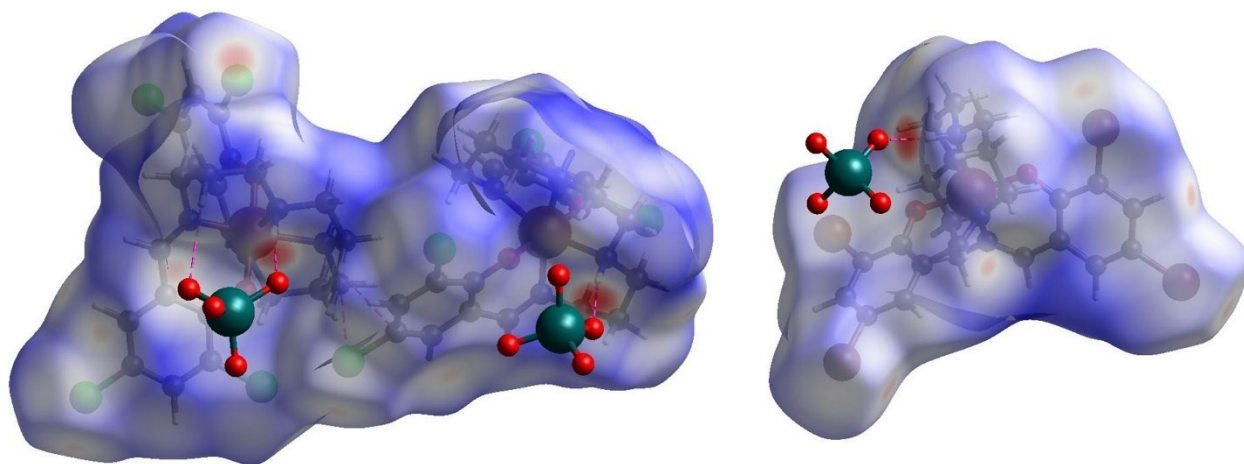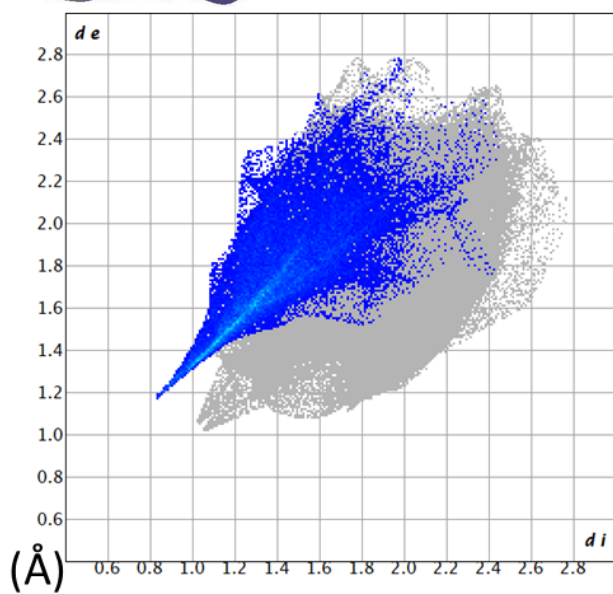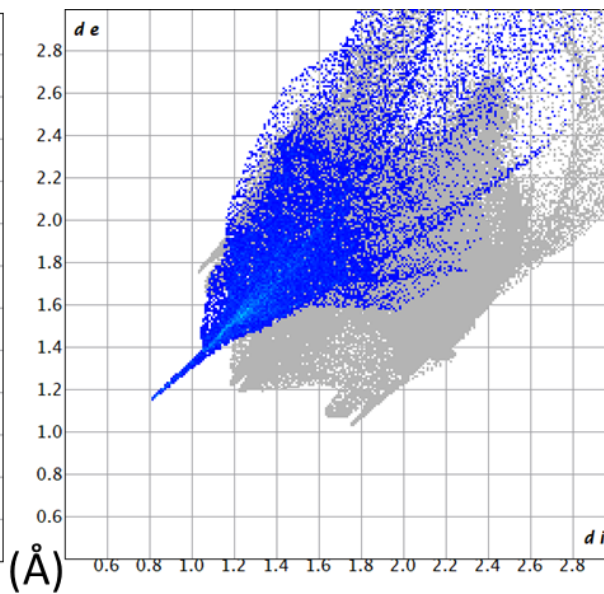

**Fig. S26.** Hirshfeld surface analysis of complexes **3** (left) and **4** (right), showing the  $d_{\text{norm}}$  surfaces of the monocationic unit ( $[\text{Mn}(5\text{X-sal}_2\text{-323})]^+$ ) (top) and 2D fingerprint plots of  $\text{O}\cdots\text{H}$  contact (bottom) at 296 K.

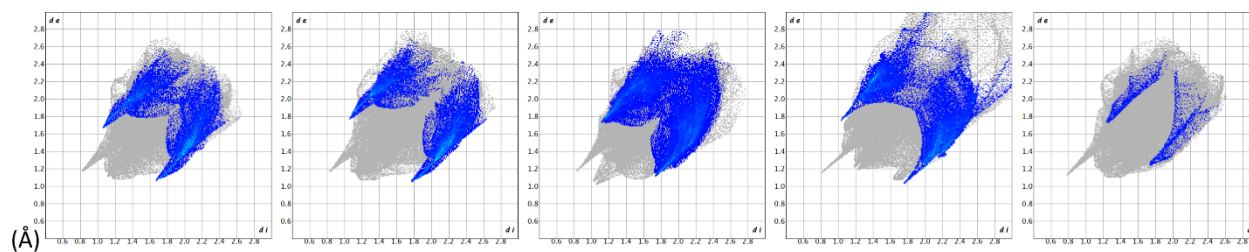

**Fig. S27.** Hirshfeld surface analysis of complexes **1 - 5** (left to right), showing 2D fingerprint plots of  $\text{X}\cdots\text{H}$  contacts at 296 K.

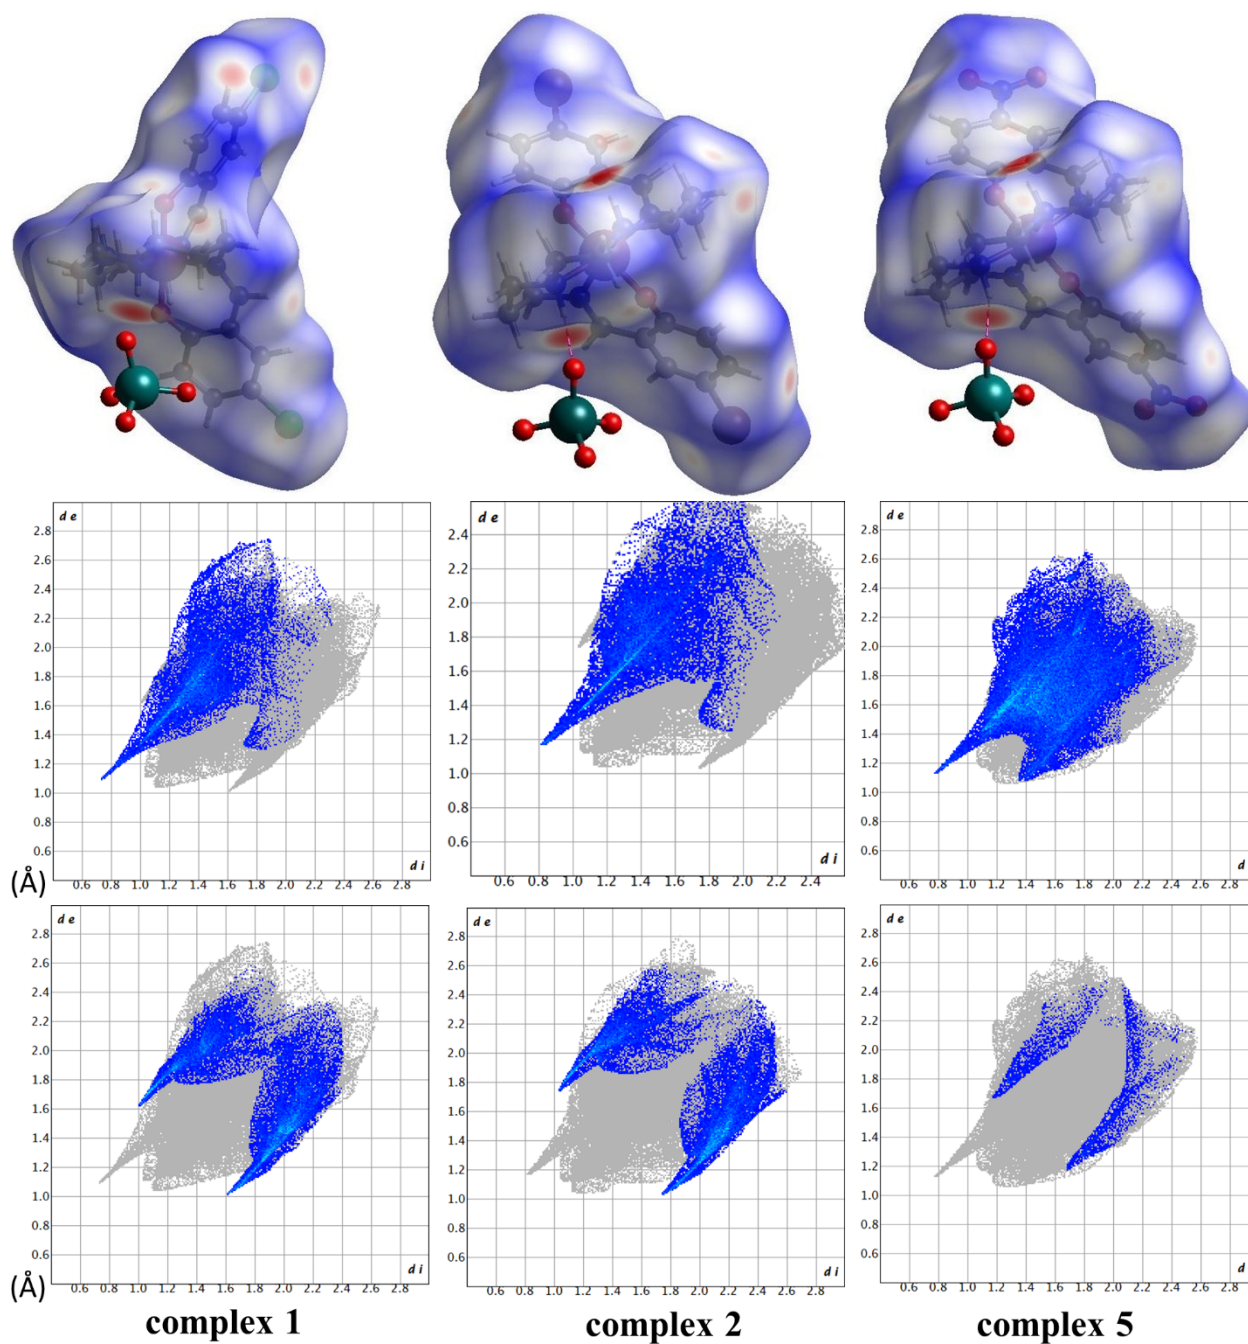

**Fig. S28.** Hirshfeld surface analysis of complexes **1**, **2**, and **5** (left to right), showing the  $d_{\text{norm}}$  surfaces of the monocationic unit ( $[\text{Mn}(5\text{X-sal}_2\text{-323})]^+$ ) (top) and 2D fingerprint plots of  $\text{O}\cdots\text{H}$  contact (middle) and  $\text{X}\cdots\text{H}$  contact (bottom) at 90 K for **1** and 120 K for **2** and **5**.

## Spectroscopic studies

UV-vis-NIR spectroscopic studies were carried out on **1** – **5** in solid-state as well as in solution at room temperature (Fig. S29 and S30). UV-vis-NIR spectra of **1** – **3**, and **5** in acetonitrile exhibit one broad band along with two shoulders at around 1179 – 1275 nm, 660 – 687 nm, and 580 – 601 nm respectively, which are ascribed to the *d-d* transitions ( ${}^5A_{1g} \rightarrow {}^5B_{1g}$ ,  ${}^5A_{1g} \rightarrow {}^5E_g$  and  ${}^5A_{1g} \rightarrow {}^5B_{2g}$ ) for HS manganese(III) ion in a distorted octahedral system which is tetragonally compressed. Due to the tailing effect from the nearby ligand-to-metal charge transfer (LMCT) transition the band around 580 – 601 nm has a higher molar coefficient. However, the UV-vis-NIR spectrum of **4** exhibited a broad band at around 1276 nm, a bulge at 693 nm, and a sharp band at around 597 nm, which may be attributed to the *d-d* transitions for LS manganese(III). Apart from the *d-d* transitions, UV-vis-NIR spectra reveal the phenolate ligand-based LMCT transition at around 520 – 537 nm, LMCT transition from imine and amine-based nitrogen donors around 369 - 380 nm, and intra-ligand charge transfer (ILCT) transition at around 271 – 288 nm. The solid-state spectra of complexes **1** – **5** also exhibit very similar absorption bands suggesting that all complexes have well-preserved its identity in both solid-state as well as upon dissolution.



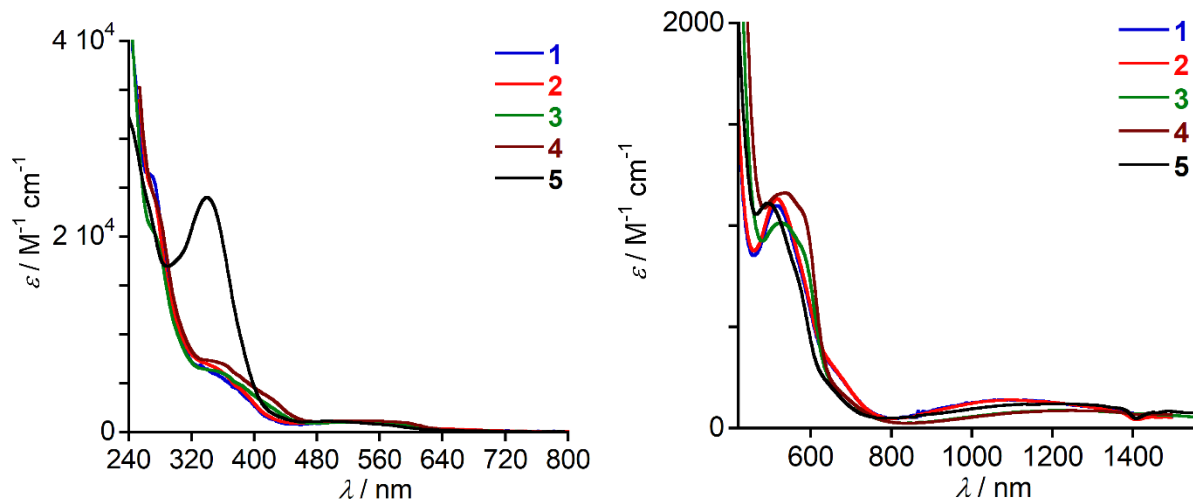

**Fig. S29.** UV-vis-NIR spectra of **1** – **5** in MeCN with dilute (left) and concentrated (right) solutions at room temperature.

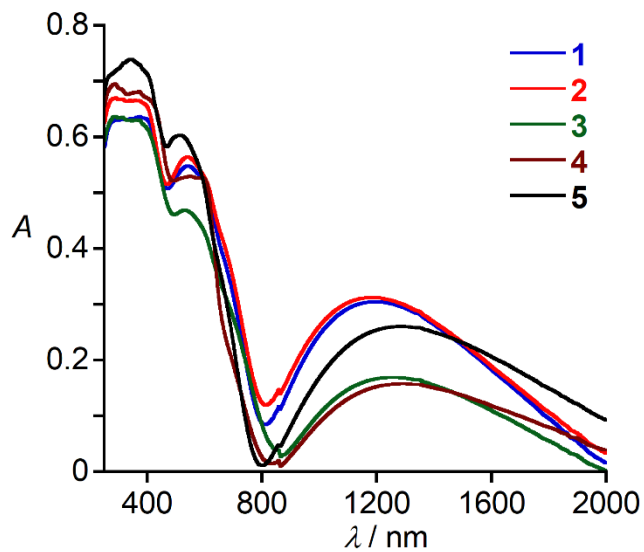

**Fig. S30.** Solid state UV-vis-NIR spectra of **1** – **5** in KBr at room temperature.

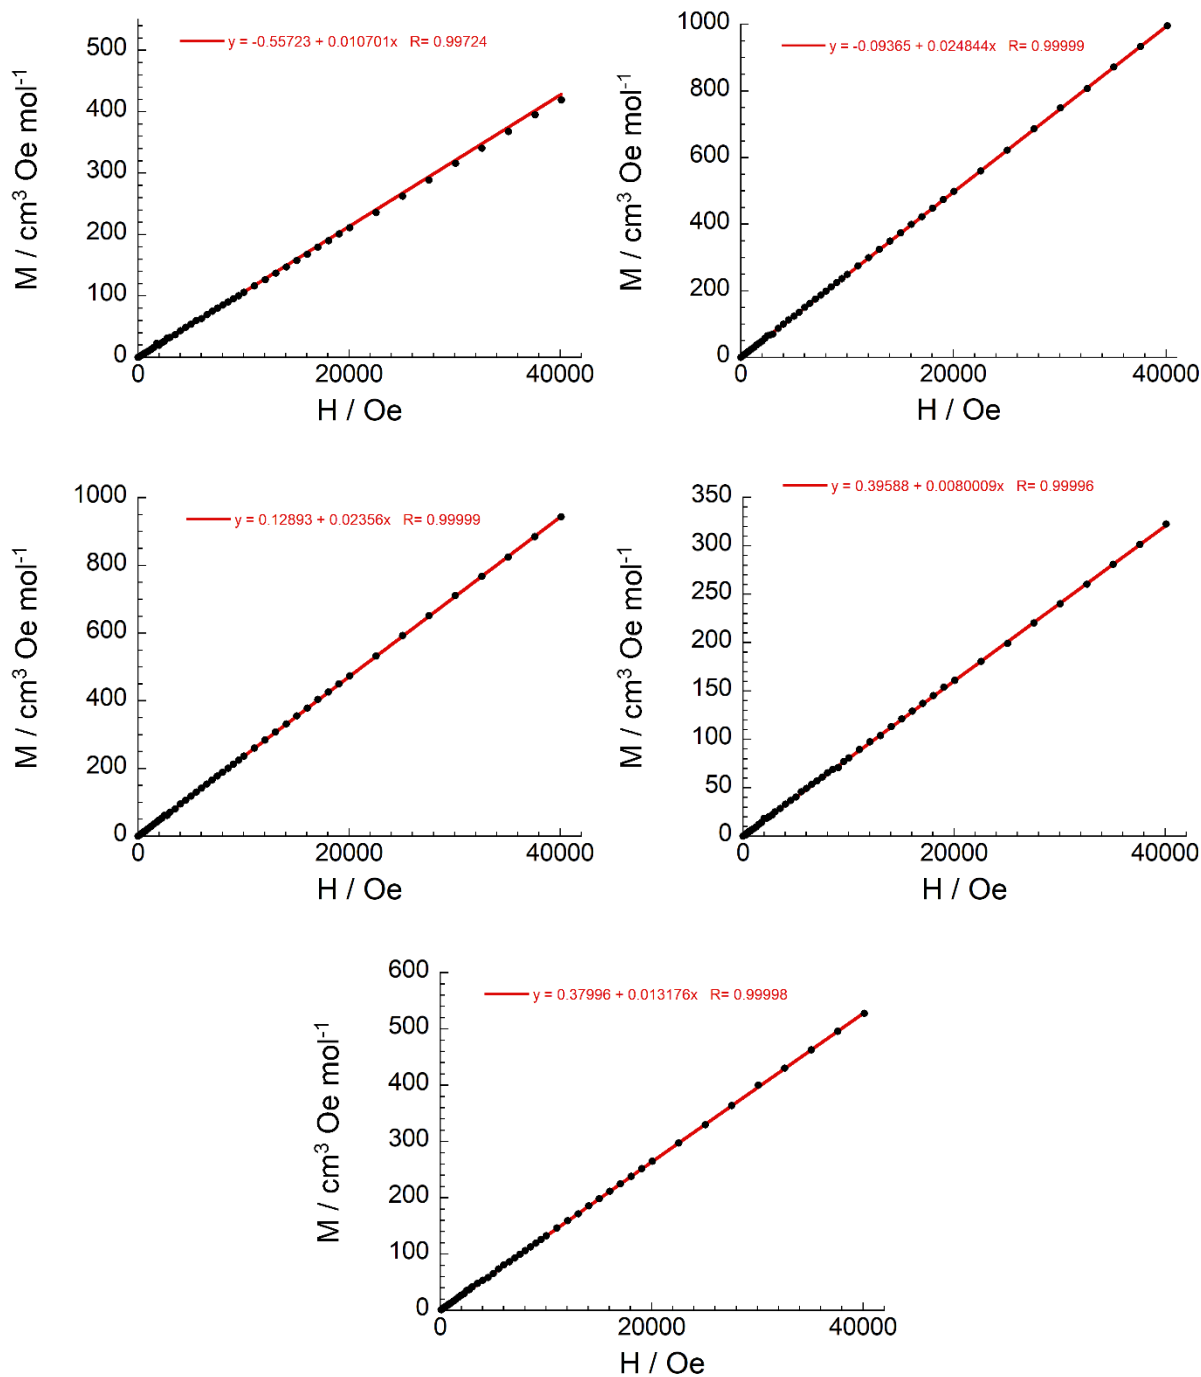

**Fig. S31.** Field dependence of the magnetization as  $M$  vs  $H$  plots for **1 - 5** at 100 K. The solid line is the best fit.

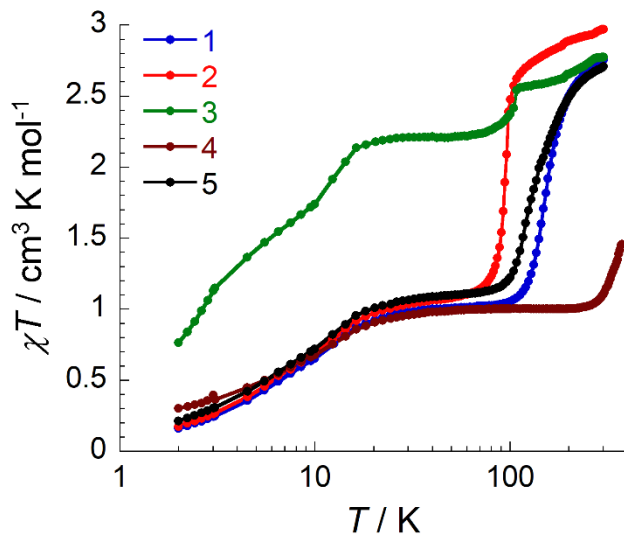

**Fig. S32.** Temperature dependence of  $\chi T$  product in log scale for **1** – **5** at 1000 Oe.

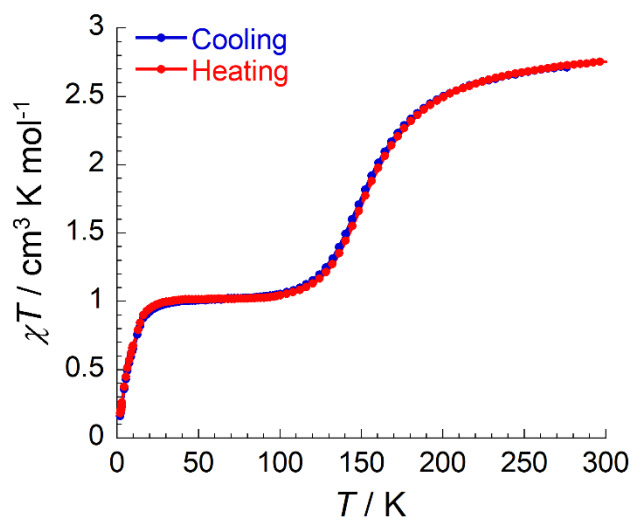

**Fig. S33.** Temperature dependence of  $\chi T$  product for **1** at 1000 Oe in cooling and heating mode.

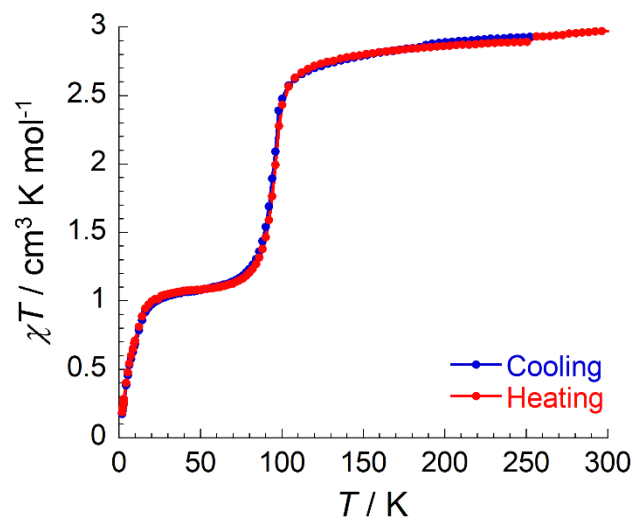

Fig. S34. Temperature dependence of  $\chi T$  product for **2** at 1000 Oe in cooling and heating mode.

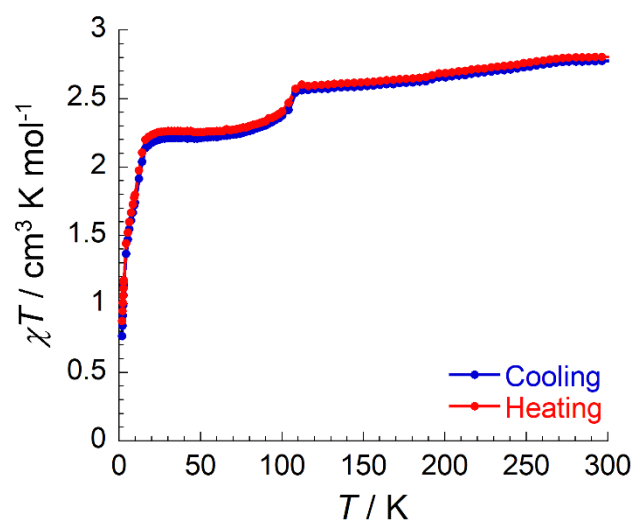

Fig. S35. Temperature dependence of  $\chi T$  product for **3** at 1000 Oe in cooling and heating mode.

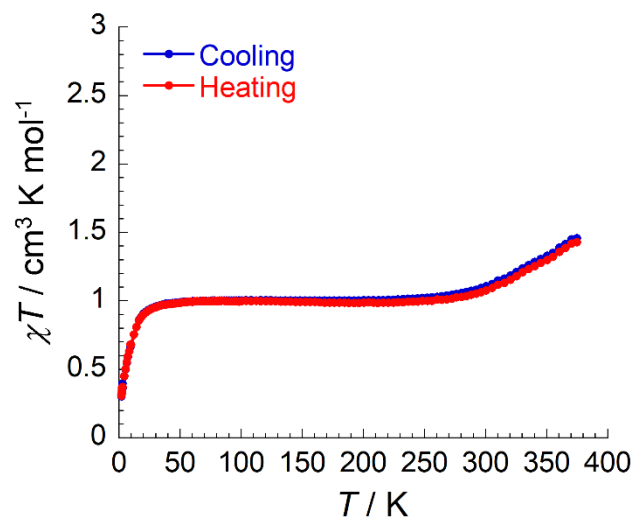

Fig. S36. Temperature dependence of  $\chi T$  product for 4 at 1000 Oe in cooling and heating mode.

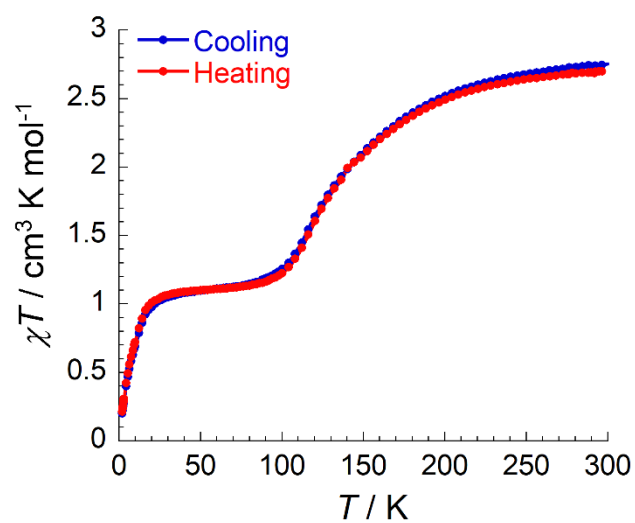

Fig. S37. Temperature dependence of  $\chi T$  product for 5 at 1000 Oe in cooling and heating mode.

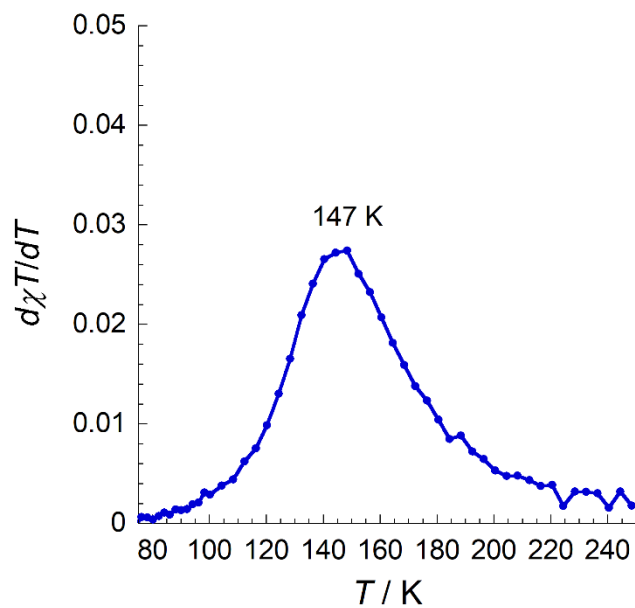

**Fig. S38.** The first derivative of  $\chi T$  against the temperature,  $d\chi T/dT$  vs.  $T$ , identifies  $T_{1/2} = 147$  K for **1**.

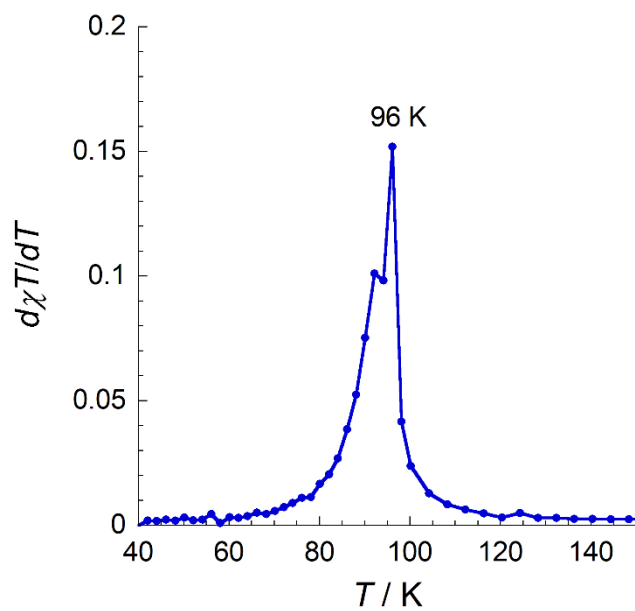

**Fig. S39.** The first derivative of  $\chi T$  against the temperature,  $d\chi T/dT$  vs.  $T$ , identifies  $T_{1/2} = 96$  K for **2**.

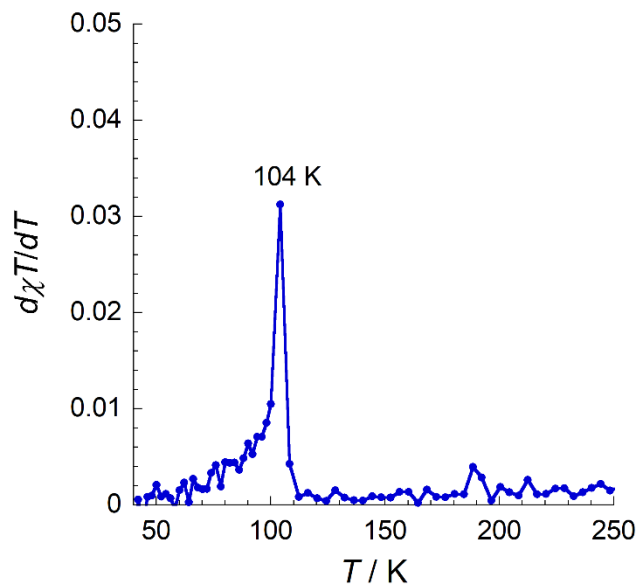

**Fig. S40.** The first derivative of  $\chi T$  against the temperature,  $d\chi T/dT$  vs.  $T$ , identifies  $T_{1/2} = 104$  K for **3**.

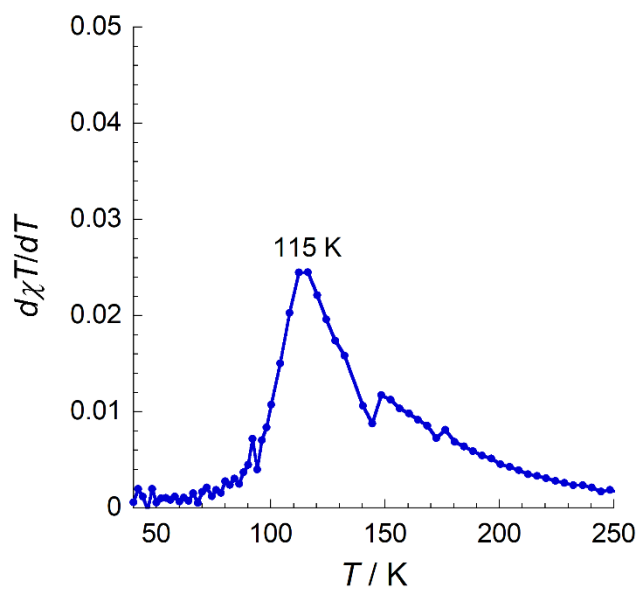

**Fig. S41.** The first derivative of  $\chi T$  against the temperature,  $d\chi T/dT$  vs.  $T$ , identifies  $T_{1/2} = 115$  K for **5**.

The following equation deduced from the ideal solution model was applied to fit the spin crossover properties observed by magnetic studies.

$$X = X_{LS} + \frac{X_{HS} - X_{LS}}{1 + \exp [\Delta H/R (1/T - 1/T_{1/2})]}$$

$X = \chi T$  product

$X_{LS} = \chi T$  product for pure low-spin

$X_{HS} = \chi T$  product for pure high-spin

$\Delta H$  = Enthalpy change associated with the spin crossover phenomenon

$R$  = Ideal gas constant



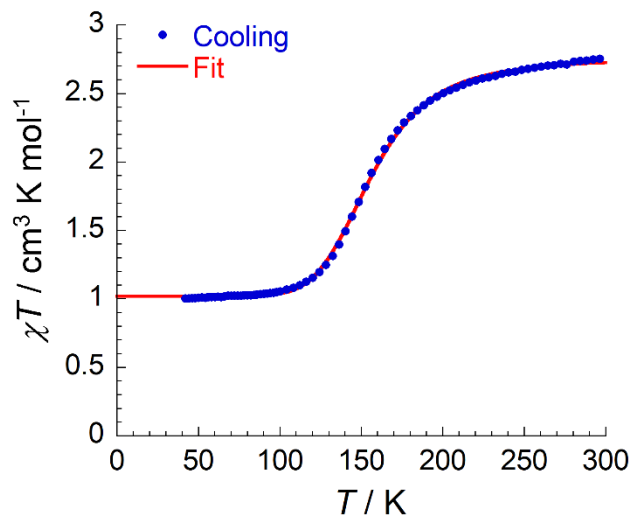

**Fig. S42** Fitting of  $\chi T$  vs  $T$  data of **1** using the ideal solution model.

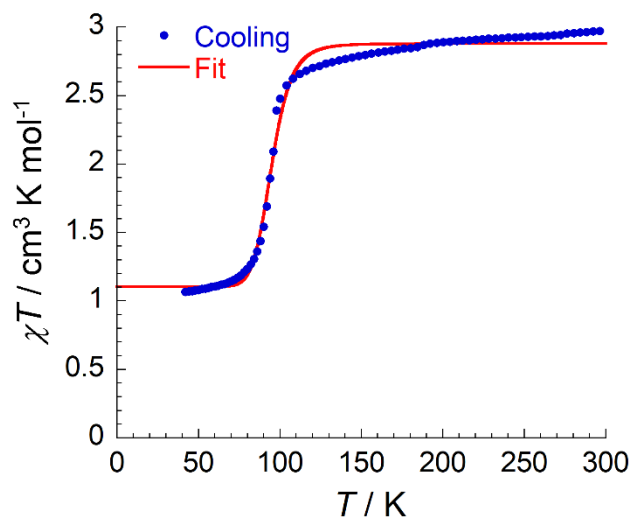

**Fig. S43** Fitting of  $\chi T$  vs  $T$  data of **2** using the ideal solution model.

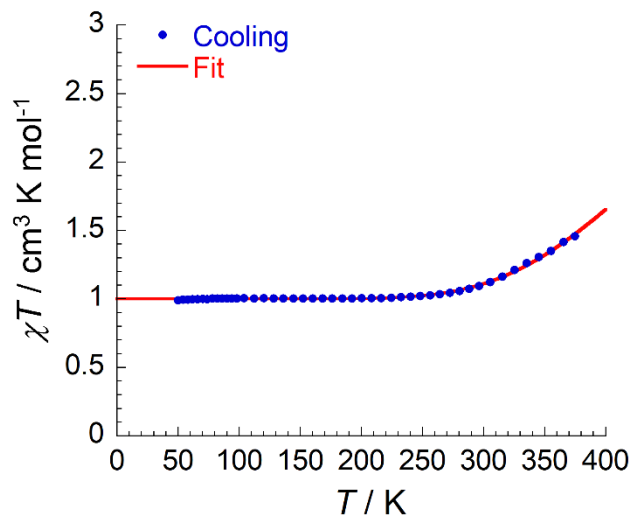

**Fig. S44** Fitting of  $\chi T$  vs  $T$  data of **4** using the ideal solution model.

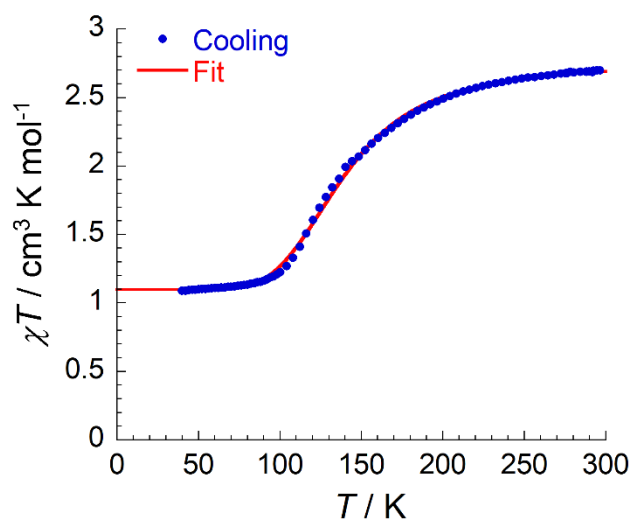

**Fig. S45** Fitting of  $\chi T$  vs  $T$  data of **5** using the ideal solution model.

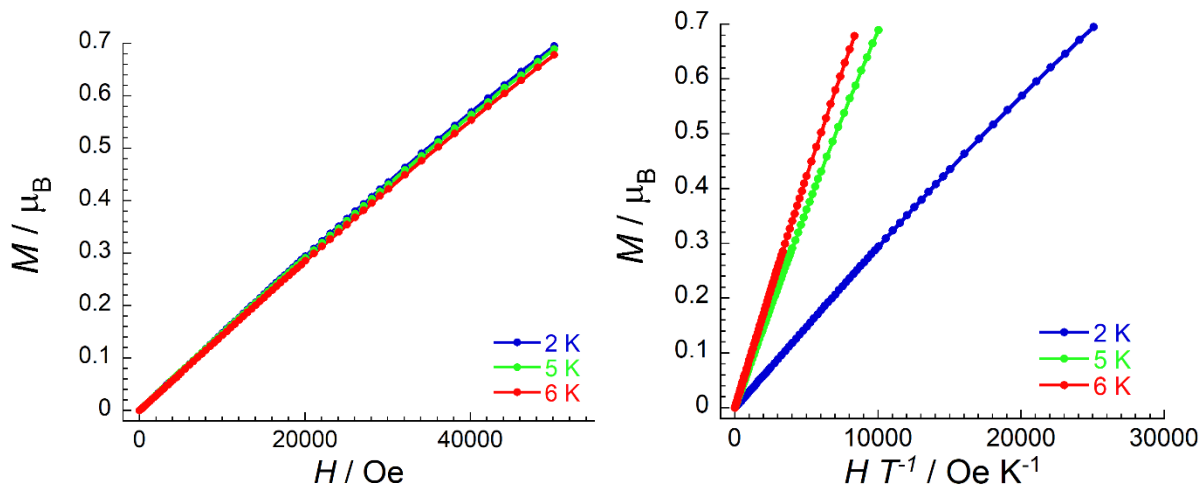

**Fig. S46.** Field dependence of the magnetization as  $M$  vs  $H$  (left) and  $M$  vs  $H/T$  (right) plots for **1** at 2, 5 and 6 K. The solid lines are guide for the eyes.

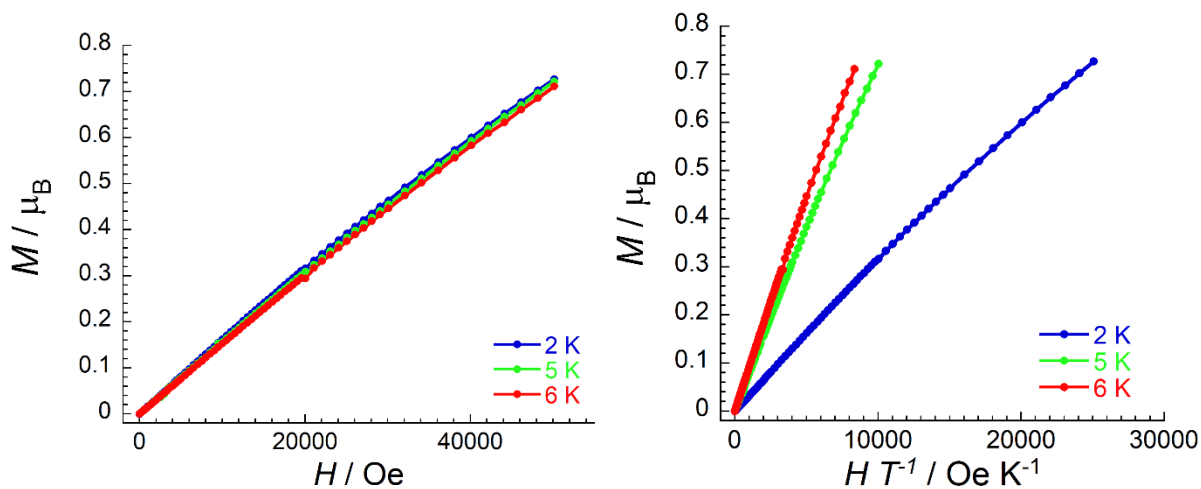

**Fig. S47.** Field dependence of the magnetization as  $M$  vs  $H$  (left) and  $M$  vs  $H/T$  (right) plots for **2** at 2, 5 and 6 K. The solid lines are guide for the eyes.

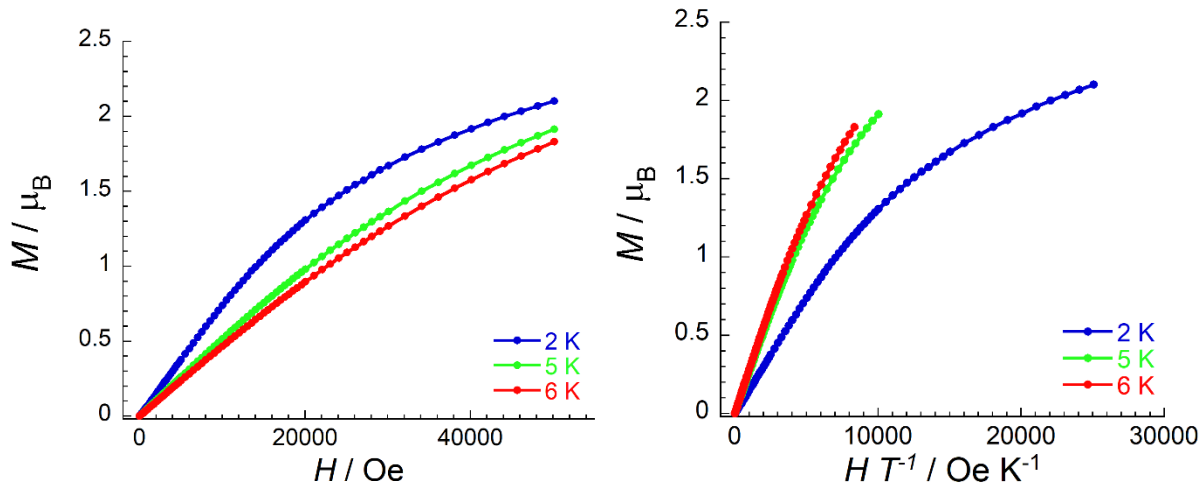

**Fig. S48.** Field dependence of the magnetization as  $M$  vs  $H$  (left) and  $M$  vs  $H/T$  (right) plots for **3** at 2, 5 and 6 K. The solid lines are guide for the eyes.

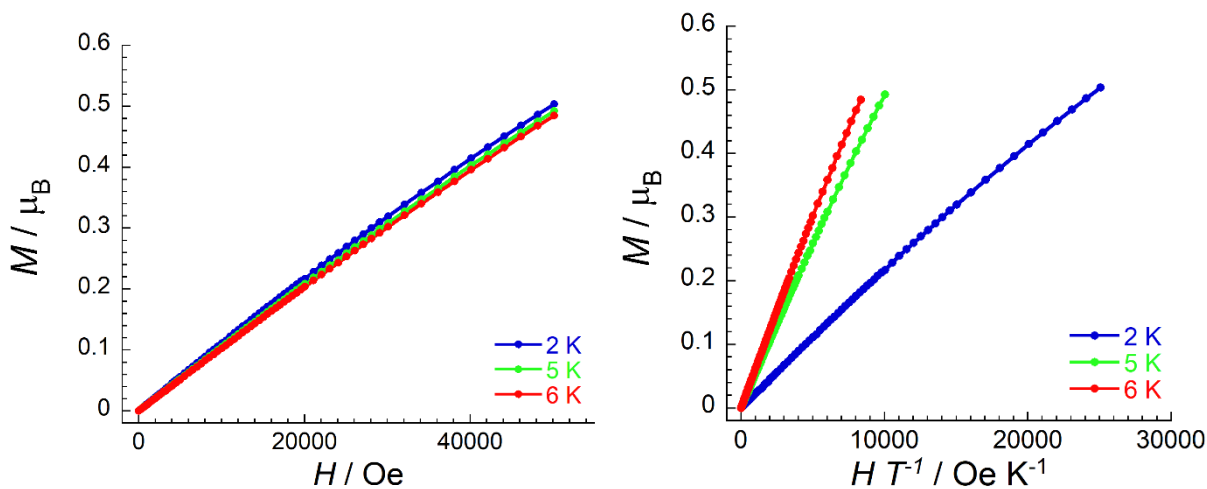

**Fig. S49.** Field dependence of the magnetization as  $M$  vs  $H$  (left) and  $M$  vs  $H/T$  (right) plots for **4** at 2, 5 and 6 K. The solid lines are guide for the eyes.

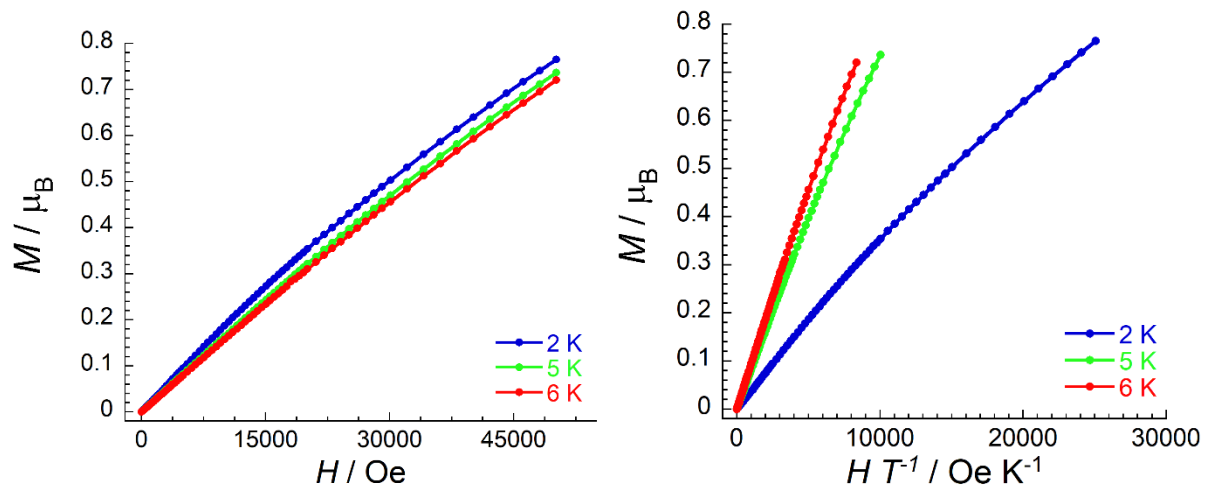

**Fig. S50.** Field dependence of the magnetization as  $M$  vs  $H$  (left) and  $M$  vs  $H/T$  (right) plots for **5** at 2, 5 and 6 K. The solid lines are guide for the eyes.

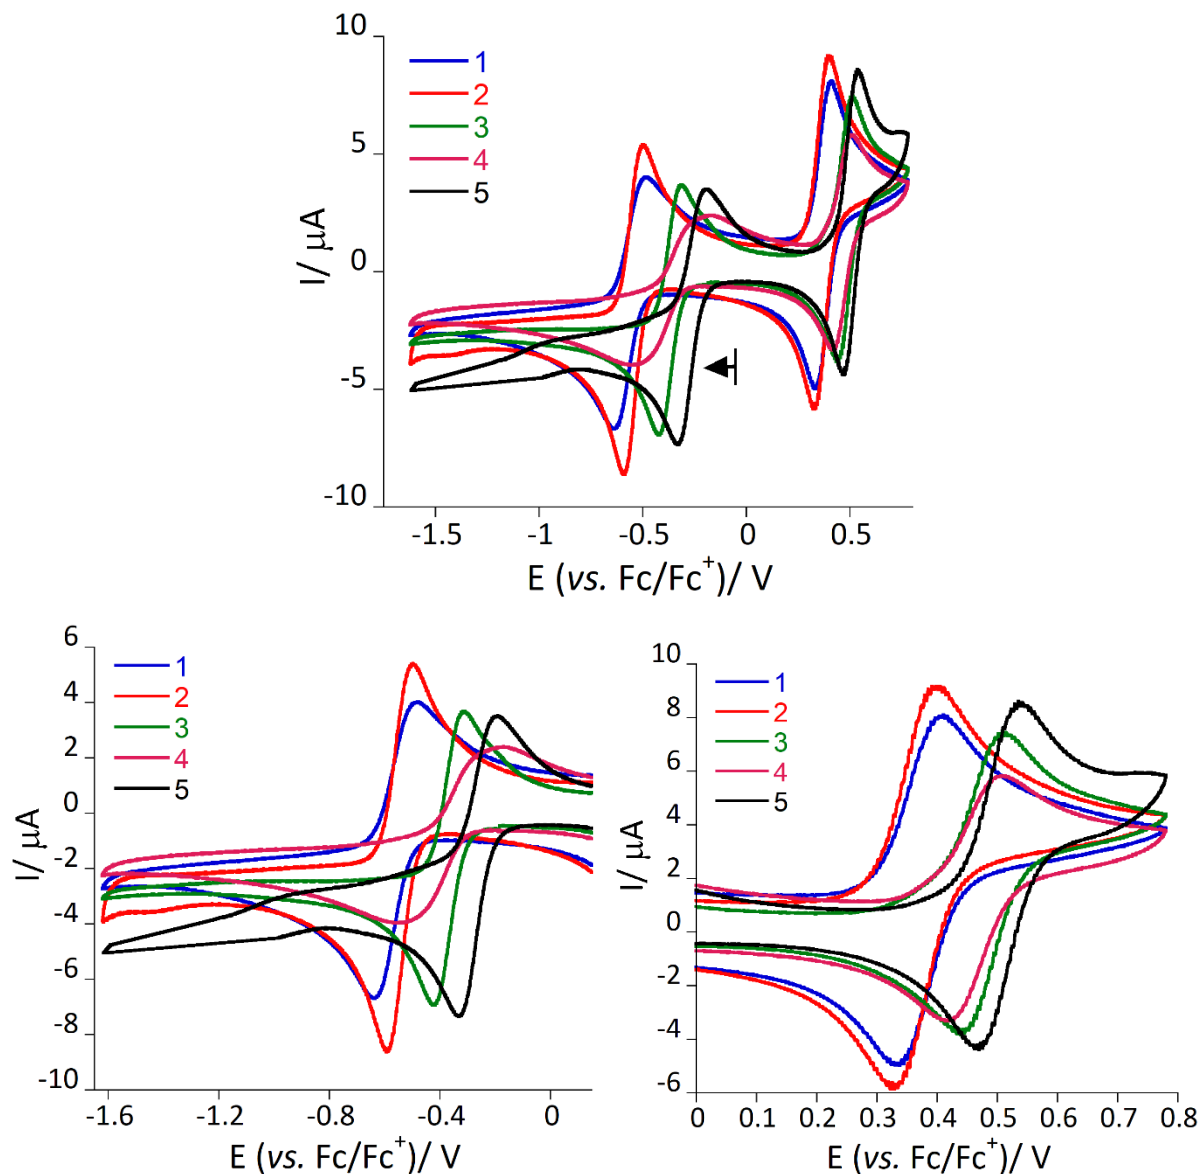

**Fig. S51.** Top: Cyclic voltammograms of **1** – **5** in 0.2 M  $(t\text{Bu}_4\text{N})\text{PF}_6 / \text{MeCN}$  with scan rate of 100 mV/s. Arrow indicates the direction of the potential sweep. Bottom: Zoom in section of the Cyclic voltammograms; reduction (left) and oxidation (right).

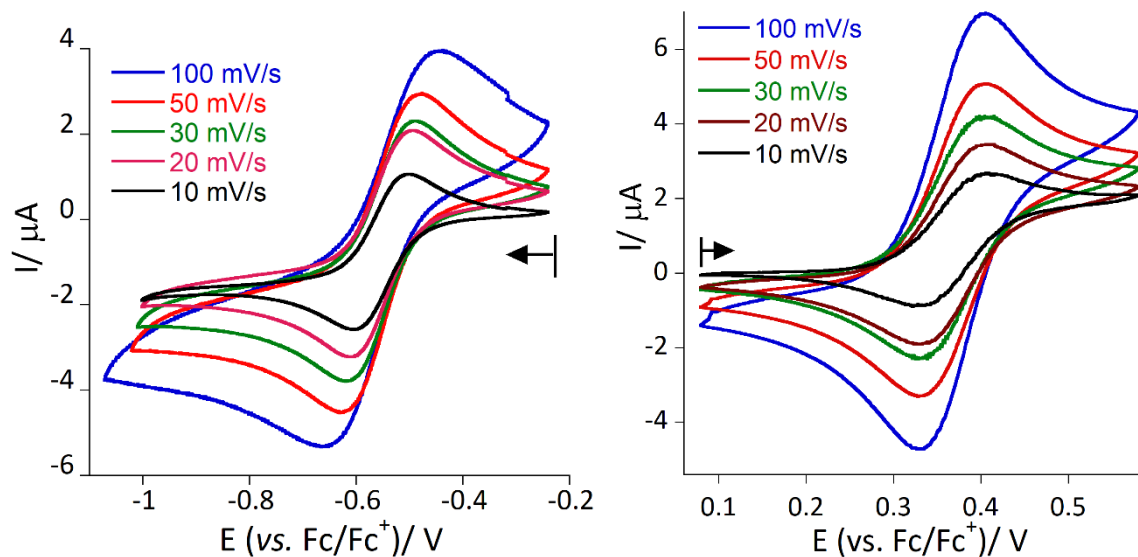

**Fig. S52.** Cyclic voltammograms for reduction (left) and oxidation (right) of **1** in 0.2 M  $(n\text{Bu}_4\text{N})\text{PF}_6 / \text{MeCN}$  with different scan rate. Arrow indicates the direction of the potential sweep.

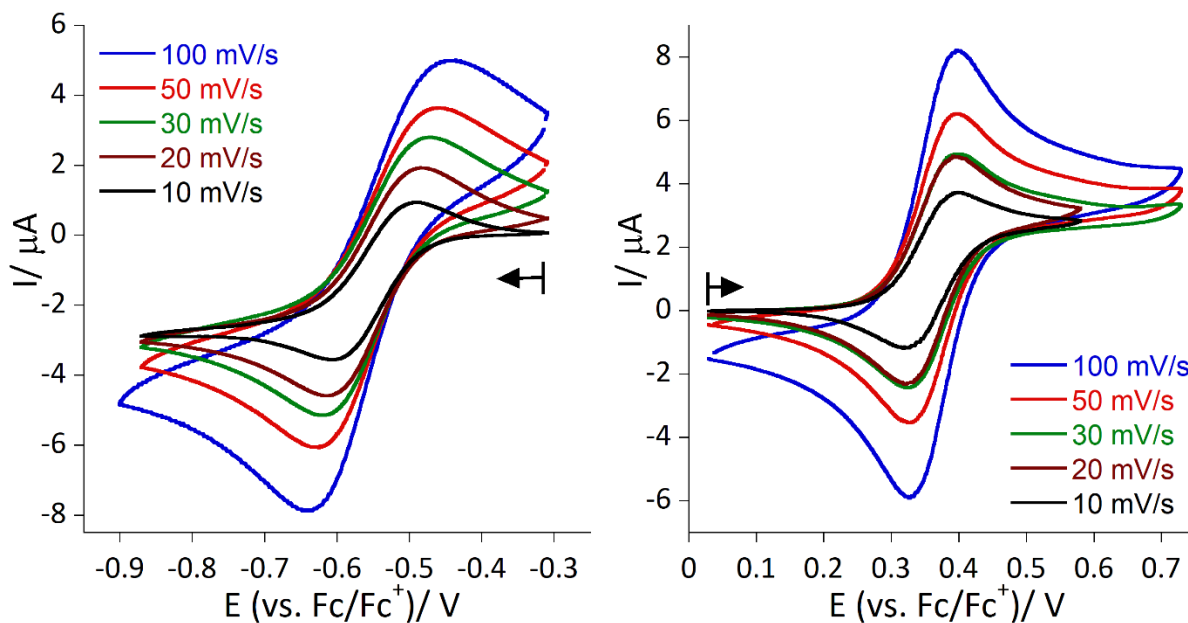

**Fig. S53.** Cyclic voltammograms for reduction (left) and oxidation (right) of **2** in 0.2 M  $(n\text{Bu}_4\text{N})\text{PF}_6 / \text{MeCN}$  with different scan rate. Arrow indicates the direction of the potential sweep.

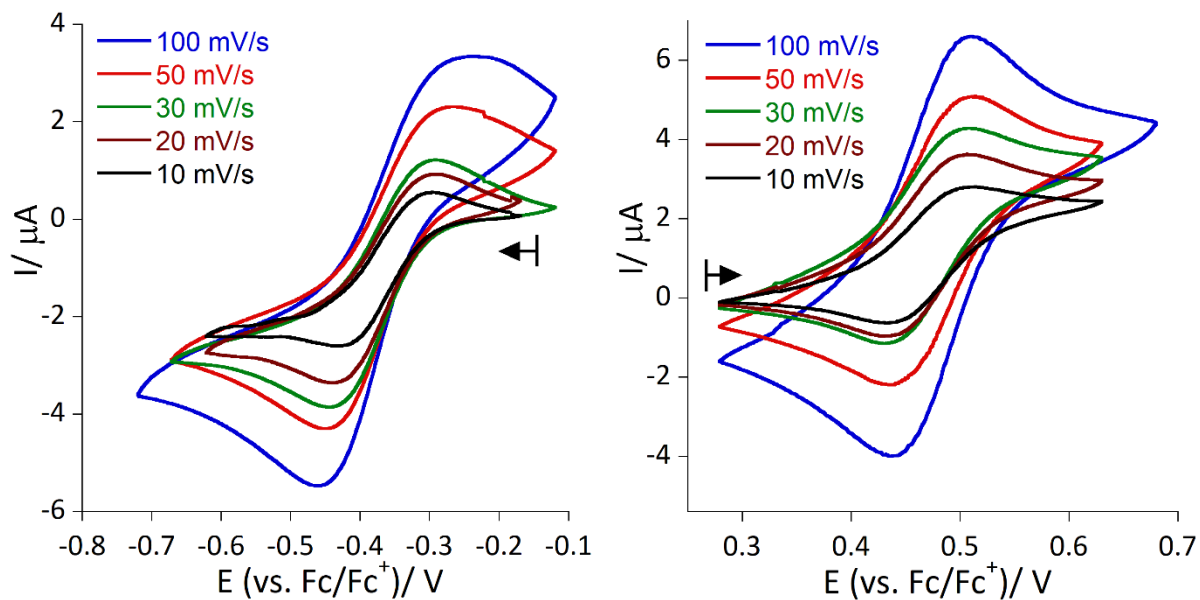

**Fig. S54.** Cyclic voltammograms for reduction (left) and oxidation (right) of 3 in 0.2 M  $(n\text{Bu}_4\text{N})\text{PF}_6 / \text{MeCN}$  with different scan rate. Arrow indicates the direction of the potential sweep.

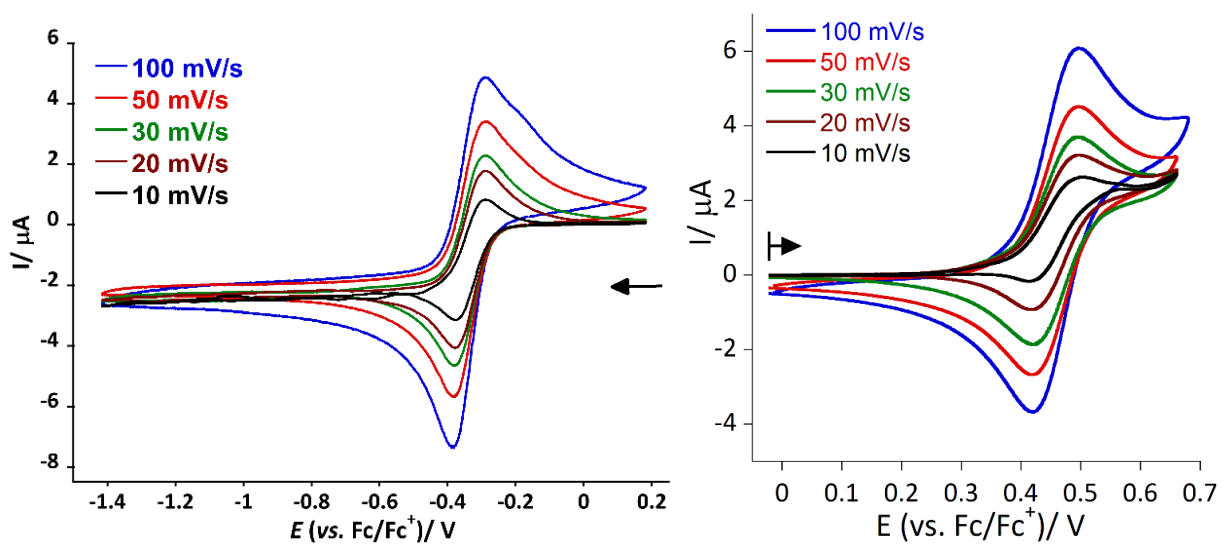

**Fig. S55.** Cyclic voltammograms for reduction (left) and oxidation (right) of 4 in 0.2 M  $(n\text{Bu}_4\text{N})\text{PF}_6 / \text{MeCN}$  with different scan rate. Arrow indicates the direction of the potential sweep.



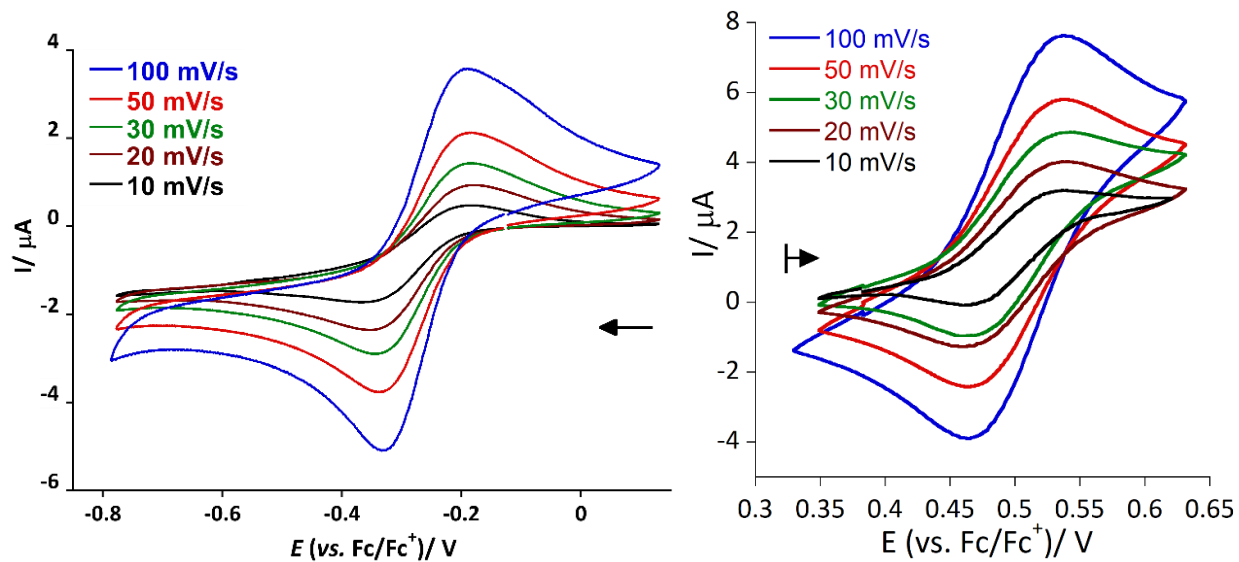

**Fig. S56.** Cyclic voltammograms for reduction (left) and oxidation (right) of **5** in 0.2 M (<sup>n</sup>Bu<sub>4</sub>N)PF<sub>6</sub> / MeCN with different scan rate. Arrow indicates the open circuit potential with the direction of the potential sweep.

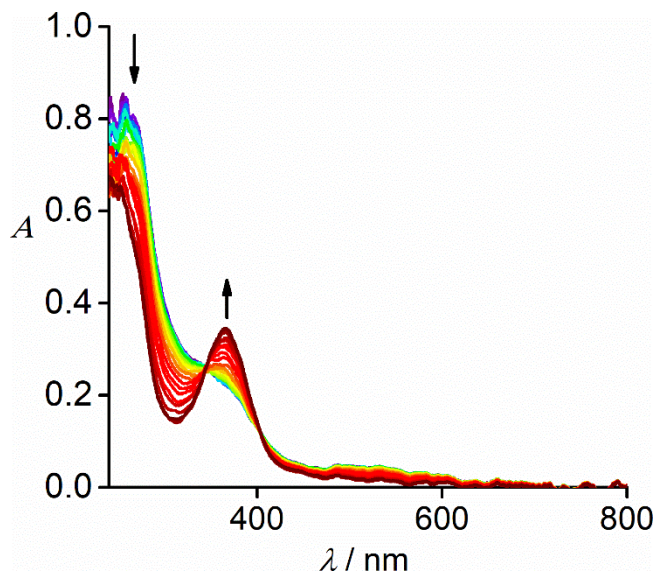

**Fig. S57.** Solution-state spectroelectrochemistry of **1** in 0.2 M (<sup>n</sup>Bu<sub>4</sub>N)PF<sub>6</sub> / MeCN over the potential range of 0.0 V to -0.65 V vs Fc/Fc<sup>+</sup>. Arrows indicate the change in absorbance with the application of potential.

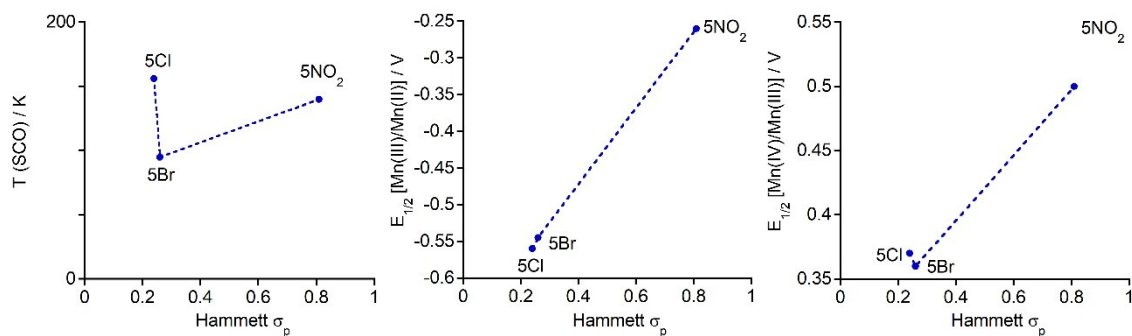

**Fig. S58.** Plot of T (SCO) vs Hammett  $\sigma_p$ ,  $E_{1/2}$  [Mn(III)/Mn(II)] vs Hammett  $\sigma_p$ , and  $E_{1/2}$  [Mn(IV)/Mn(III)] vs Hammett  $\sigma_p$  for complexes **1** (5Cl), **2** (5Br), and **5** (5NO<sub>2</sub>).

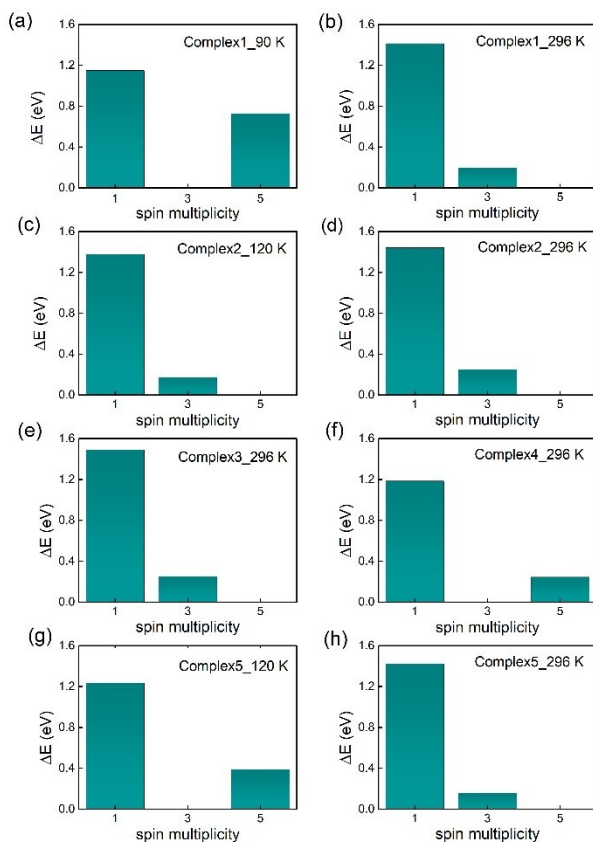

**Fig. S59.** The energy cost of the manganese (III) systems at different temperatures to be in spin states with multiplicity 1, 3, and 5. The triplet (spin multiplicity = 3) and quintet (spin multiplicity = 5) states are more favourable among different spin states. Temperature switches the systems from one of these two spin states to another. The preferred spin states of the systems at different temperatures are shown by the zero reference energy values, which agree well with experimental results.

**Tables**

**Table S1.** X-ray crystallography data for complexes **1** – **3**.

| Complex                                               | 1                                                                                  |                                                                                    |                                                                                    | 2                                                                                  |                                                                                    | 3                                                                                                              |
|-------------------------------------------------------|------------------------------------------------------------------------------------|------------------------------------------------------------------------------------|------------------------------------------------------------------------------------|------------------------------------------------------------------------------------|------------------------------------------------------------------------------------|----------------------------------------------------------------------------------------------------------------|
| CCDC no                                               | 2238257                                                                            | 2238256                                                                            | 2238255                                                                            | 2238254                                                                            | 2238253                                                                            | 2238263                                                                                                        |
| temp (K)                                              | 296                                                                                | 120                                                                                | 90                                                                                 | 296                                                                                | 120                                                                                | 296                                                                                                            |
| empirical formula                                     | C <sub>22</sub> H <sub>26</sub> N <sub>4</sub> O <sub>6</sub> Cl <sub>2</sub> MnRe | C <sub>22</sub> H <sub>26</sub> N <sub>4</sub> O <sub>6</sub> Cl <sub>2</sub> MnRe | C <sub>22</sub> H <sub>26</sub> Cl <sub>2</sub> MnN <sub>4</sub> O <sub>6</sub> Re | C <sub>22</sub> H <sub>26</sub> Br <sub>2</sub> MnN <sub>4</sub> O <sub>6</sub> Re | C <sub>22</sub> H <sub>26</sub> Br <sub>2</sub> MnN <sub>4</sub> O <sub>6</sub> Re | C <sub>44</sub> H <sub>48</sub> Cl <sub>8</sub> Mn <sub>2</sub> N <sub>8</sub> O <sub>12</sub> Re <sub>2</sub> |
| formula wt                                            | 754.51                                                                             | 754.51                                                                             | 754.51                                                                             | 843.43                                                                             | 843.43                                                                             | 1646.78                                                                                                        |
| cryst syst                                            | Monoclinic                                                                         | Monoclinic                                                                         | Monoclinic                                                                         | Monoclinic                                                                         | Monoclinic                                                                         | Orthorhombic                                                                                                   |
| space group                                           | <i>P2<sub>1</sub>/n</i>                                                            | <i>P2<sub>1</sub>/n</i>                                                            | <i>P2<sub>1</sub>/n</i>                                                            | <i>P2<sub>1</sub>/n</i>                                                            | <i>P2<sub>1</sub>/n</i>                                                            | <i>Pbca</i>                                                                                                    |
| <i>a</i> (Å)                                          | 16.6231(5)                                                                         | 16.5509(4)                                                                         | 17.0410(6)                                                                         | 16.8874(5)                                                                         | 16.5315(4)                                                                         | 18.4496(5)                                                                                                     |
| <i>b</i> (Å)                                          | 9.7269(3)                                                                          | 9.5613(3)                                                                          | 9.3416(3)                                                                          | 9.7792(2)                                                                          | 9.7435(2)                                                                          | 17.9295(5)                                                                                                     |
| <i>c</i> (Å)                                          | 17.4936(5)                                                                         | 17.3601(5)                                                                         | 17.2843(5)                                                                         | 17.5098(5)                                                                         | 17.5103(4)                                                                         | 33.6445(9)                                                                                                     |
| $\alpha$ (deg)                                        | 90                                                                                 | 90                                                                                 | 90                                                                                 | 90                                                                                 | 90                                                                                 | 90                                                                                                             |
| $\beta$ (deg)                                         | 110.7790(10)                                                                       | 110.9090(10)                                                                       | 111.2840(10)                                                                       | 111.050(2)                                                                         | 110.8880(10)                                                                       | 90                                                                                                             |
| $\gamma$ (deg)                                        | 90                                                                                 | 90                                                                                 | 90                                                                                 | 90                                                                                 | 90                                                                                 | 90                                                                                                             |
| <i>V</i> , Å <sup>3</sup>                             | 2644.58(14)                                                                        | 2566.29(13)                                                                        | 2563.82(14)                                                                        | 2698.69(13)                                                                        | 2635.10(10)                                                                        | 11129.3(5)                                                                                                     |
| <i>Z</i>                                              | 4                                                                                  | 4                                                                                  | 4                                                                                  | 4                                                                                  | 4                                                                                  | 8                                                                                                              |
| <i>d</i> <sub>calcd</sub> (g cm <sup>-3</sup> )       | 1.895                                                                              | 1.953                                                                              | 1.955                                                                              | 2.076                                                                              | 2.126                                                                              | 1.966                                                                                                          |
| $\mu$ (mm <sup>-1</sup> )                             | 5.297                                                                              | 5.458                                                                              | 5.464                                                                              | 7.954                                                                              | 8.146                                                                              | 5.229                                                                                                          |
| <i>F</i> (000)                                        | 1472                                                                               | 1472                                                                               | 1472                                                                               | 1616                                                                               | 1616                                                                               | 6400                                                                                                           |
| $\theta$ <sub>max</sub> (deg)                         | 30.597                                                                             | 30.738                                                                             | 30.619                                                                             | 30.595                                                                             | 30.557                                                                             | 24.216                                                                                                         |
| completeness (%)                                      | 99.8                                                                               | 99.7                                                                               | 99.8                                                                               | 99.8                                                                               | 99.8                                                                               | 99.8                                                                                                           |
| no. of. rflns collected                               | 8116                                                                               | 7958                                                                               | 7891                                                                               | 8268                                                                               | 8047                                                                               | 8954                                                                                                           |
| no. of. Indep rflns                                   | 5854                                                                               | 6194                                                                               | 6639                                                                               | 4719                                                                               | 6653                                                                               | 7009                                                                                                           |
| goodness of fit on <i>F</i> <sup>2</sup>              | 1.023                                                                              | 1.069                                                                              | 1.073                                                                              | 1.014                                                                              | 1.048                                                                              | 1.030                                                                                                          |
| final R indices ( <i>I</i> > 2 $\sigma$ ( <i>I</i> )) | R1 = 0.0415<br>wR2 = 0.0940                                                        | R1 = 0.0510<br>wR2 = 0.1295                                                        | R1 = 0.0316<br>wR2 = 0.0675                                                        | R1 = 0.0473<br>wR2 = 0.1049                                                        | R1 = 0.0449<br>wR2 = 0.0995                                                        | R1 = 0.0287<br>wR2 = 0.0487                                                                                    |
| final R indices (all data)                            | R1 = 0.0650<br>wR2 = 0.1059                                                        | R1 = 0.0683<br>wR2 = 0.1383                                                        | R1 = 0.0434<br>wR2 = 0.0738                                                        | R1 = 0.1045<br>wR2 = 0.1287                                                        | R1 = 0.0576<br>wR2 = 0.1064                                                        | R1 = 0.0469<br>wR2 = 0.0543                                                                                    |

**Table S2** X-ray crystallography data for complexes **4** and **5**.

| Complex                                              | <b>4</b>                                                                           |                                                                     | <b>5</b>                                                            |
|------------------------------------------------------|------------------------------------------------------------------------------------|---------------------------------------------------------------------|---------------------------------------------------------------------|
| CCDC no                                              | 2238262                                                                            | 2238260                                                             | 2238261                                                             |
| temp (K)                                             | 296                                                                                | 120                                                                 | 296                                                                 |
| empirical formula                                    | C <sub>22</sub> H <sub>24</sub> Br <sub>4</sub> MnN <sub>4</sub> O <sub>6</sub> Re | C <sub>22</sub> H <sub>26</sub> MnN <sub>6</sub> O <sub>10</sub> Re | C <sub>22</sub> H <sub>26</sub> MnN <sub>6</sub> O <sub>10</sub> Re |
| formula wt                                           | 1001.23                                                                            | 775.63                                                              | 775.63                                                              |
| cryst syst                                           | Monoclinic                                                                         | Monoclinic                                                          | Monoclinic                                                          |
| space group                                          | <i>P2<sub>1</sub>/n</i>                                                            | <i>P2<sub>1</sub>/c</i>                                             | <i>P2<sub>1</sub>/c</i>                                             |
| <i>a</i> (Å)                                         | 11.3354(4)                                                                         | 14.4389(4)                                                          | 14.5871(8)                                                          |
| <i>b</i> (Å)                                         | 19.4830(8)                                                                         | 9.5636(2)                                                           | 9.6713(5)                                                           |
| <i>c</i> (Å)                                         | 13.7919(5)                                                                         | 19.3303(5)                                                          | 19.4954(11)                                                         |
| $\alpha$ (deg)                                       | 90                                                                                 | 90                                                                  | 90                                                                  |
| $\beta$ (deg)                                        | 97.997(2)                                                                          | 93.3860(10)                                                         | 92.346(3)                                                           |
| $\gamma$ (deg)                                       | 90                                                                                 | 90                                                                  | 90                                                                  |
| <i>V</i> , Å <sup>3</sup>                            | 3016.3(2)                                                                          | 2664.62(12)                                                         | 2748.0(3)                                                           |
| <i>Z</i>                                             | 4                                                                                  | 4                                                                   | 4                                                                   |
| <i>d</i> <sub>calcd</sub> (g cm <sup>-3</sup> )      | 2.205                                                                              | 1.933                                                               | 1.875                                                               |
| $\mu$ (mm <sup>-1</sup> )                            | 9.768                                                                              | 5.079                                                               | 4.925                                                               |
| <i>F</i> (000)                                       | 1888                                                                               | 1520                                                                | 1520                                                                |
| $\theta_{\max}$ (deg)                                | 30.598                                                                             | 30.563                                                              | 30.575                                                              |
| completeness (%)                                     | 98.7                                                                               | 98.0                                                                | 97.9                                                                |
| no. of. rflns collected                              | 9155                                                                               | 8023                                                                | 8231                                                                |
| no. of. Indep rflns                                  | 5585                                                                               | 6454                                                                | 4422                                                                |
| goodness of fit on <i>F</i> <sup>2</sup>             | 1.011                                                                              | 1.035                                                               | 1.029                                                               |
| final R indices ( <i>I</i> >2 $\sigma$ ( <i>I</i> )) | R1 = 0.0411<br>wR2 = 0.0691                                                        | R1 = 0.0431<br>wR2 = 0.0948                                         | R1 = 0.0466<br>wR2 = 0.0804                                         |
| final R indices (all data)                           | R1 = 0.0929<br>wR2 = 0.0810                                                        | R1 = 0.0576<br>wR2 = 0.1018                                         | R1 = 0.1231<br>wR2 = 0.0985                                         |

**Table S3.** Selected bond distances (Å) and bond angles (°) in **1** and **2**.

| Complex         | <b>1</b>   |            |            | <b>2</b>   |            |
|-----------------|------------|------------|------------|------------|------------|
|                 | 296 K      | 120 K      | 90 K       | 296 K      | 120 K      |
| Mn(1)-N(1)      | 2.190(4)   | 2.087(4)   | 2.048(3)   | 2.213(6)   | 2.207(5)   |
| Mn(1)-N(2)      | 2.199(4)   | 2.101(4)   | 2.050(3)   | 2.197(6)   | 2.166(5)   |
| Mn(1)-N(3)      | 2.092(4)   | 2.016(4)   | 1.992(3)   | 2.091(5)   | 2.121(5)   |
| Mn(1)-N(4)      | 2.115(4)   | 2.028(4)   | 1.994(3)   | 2.115(5)   | 2.071(4)   |
| Mn(1)-O(1)      | 1.866(3)   | 1.873(3)   | 1.876(2)   | 1.870(4)   | 1.875(3)   |
| Mn(1)-O(2)      | 1.876(3)   | 1.878(3)   | 1.882(2)   | 1.874(4)   | 1.868(4)   |
| N(1)-Mn(1)-N(2) | 80.68(17)  | 83.68(18)  | 84.75(12)  | 79.8(2)    | 80.59(19)  |
| N(1)-Mn(1)-N(3) | 163.11(17) | 168.91(19) | 171.69(12) | 85.2(2)    | 161.55(19) |
| N(1)-Mn(1)-N(4) | 83.66(17)  | 86.34(18)  | 87.40(12)  | 160.8(2)   | 85.74(17)  |
| N(1)-Mn(1)-O(1) | 85.19(14)  | 85.28(17)  | 92.92(12)  | 95.8(2)    | 85.20(16)  |
| N(1)-Mn(1)-O(2) | 95.61(15)  | 93.61(17)  | 85.90(11)  | 85.65(19)  | 95.71(17)  |
| N(2)-Mn(1)-N(3) | 85.00(15)  | 87.42(17)  | 88.85(12)  | 162.6(2)   | 83.29(19)  |
| N(2)-Mn(1)-N(4) | 161.92(17) | 167.90(19) | 170.27(12) | 85.7(2)    | 164.11(19) |
| N(2)-Mn(1)-O(1) | 95.34(15)  | 93.39(16)  | 85.13(11)  | 95.8(2)    | 95.24(17)  |
| N(2)-Mn(1)-O(2) | 85.39(14)  | 84.86(16)  | 92.46(12)  | 112.7(2)   | 85.64(17)  |
| N(3)-Mn(1)-N(4) | 111.76(15) | 103.24(17) | 199.47(12) | 87.09(18)  | 111.38(18) |
| N(3)-Mn(1)-O(1) | 87.28(13)  | 92.58(17)  | 91.81(11)  | 92.81(13)  | 87.40(16)  |
| N(3)-Mn(1)-O(2) | 92.10(14)  | 92.15(17)  | 89.09(11)  | 91.80(19)  | 91.93(17)  |
| N(4)-Mn(1)-O(1) | 92.30(15)  | 92.58(17)  | 89.55(11)  | 92.20(19)  | 91.63(16)  |
| N(4)-Mn(1)-O(2) | 87.20(14)  | 88.98(16)  | 92.70(12)  | 86.77(18)  | 87.71(16)  |
| O(1)-Mn(1)-O(2) | 179.00(14) | 178.03(14) | 177.41(11) | 178.06(18) | 178.83(16) |

**Table S4.** Selected bond distances (Å) and bond angles (°) in **3** at 296 K.

|                 |            |                 |            |
|-----------------|------------|-----------------|------------|
| Mn(1)-N(1)      | 2.180(4)   | Mn(2)-N(5)      | 2.218(4)   |
| Mn(1)-N(2)      | 2.223(4)   | Mn(2)-N(6)      | 2.225(4)   |
| Mn(1)-N(3)      | 2.113(4)   | Mn(2)-N(7)      | 2.102(4)   |
| Mn(1)-N(4)      | 2.100(4)   | Mn(2)-N(8)      | 2.086(4)   |
| Mn(1)-O(1)      | 1.877(3)   | Mn(2)-O(3)      | 1.879(3)   |
| Mn(1)-O(2)      | 1.876(3)   | Mn(2)-O(4)      | 1.873(3)   |
| N(1)-Mn(1)-N(2) | 79.96(15)  | N(5)-Mn(2)-N(6) | 79.11(16)  |
| N(1)-Mn(1)-N(3) | 85.94(15)  | N(5)-Mn(2)-N(7) | 163.34(16) |
| N(1)-Mn(1)-N(4) | 161.76(15) | N(5)-Mn(2)-N(8) | 85.31(16)  |
| N(1)-Mn(1)-O(1) | 86.78(14)  | N(5)-Mn(2)-O(3) | 90.29(13)  |
| N(1)-Mn(1)-O(2) | 93.76(14)  | N(5)-Mn(2)-O(4) | 85.30(9)   |
| N(2)-Mn(1)-N(3) | 164.20(15) | N(6)-Mn(2)-N(7) | 84.67(16)  |
| N(2)-Mn(1)-N(4) | 83.27(15)  | N(6)-Mn(2)-N(8) | 164.11(16) |
| N(2)-Mn(1)-O(1) | 95.72(14)  | N(6)-Mn(2)-O(3) | 92.75(14)  |
| N(2)-Mn(1)-O(2) | 87.36(13)  | N(6)-Mn(2)-O(4) | 90.43(14)  |
| N(3)-Mn(1)-N(4) | 111.52(15) | N(7)-Mn(2)-N(8) | 111.07(15) |
| N(3)-Mn(1)-O(1) | 90.53(14)  | N(7)-Mn(2)-O(3) | 86.68(14)  |
| N(3)-Mn(1)-O(2) | 86.48(14)  | N(7)-Mn(2)-O(4) | 90.95(14)  |
| N(4)-Mn(1)-O(1) | 87.81(14)  | N(8)-Mn(2)-O(3) | 90.44(13)  |
| N(4)-Mn(1)-O(2) | 92.57(13)  | N(8)-Mn(2)-O(4) | 87.23(13)  |
| O(1)-Mn(1)-O(2) | 176.92(13) | O(3)-Mn(2)-O(4) | 175.84(13) |

**Table S5.** Selected bond distances (Å) and bond angles (°) in **4** and **5**.

| Complex         | <b>4</b>   |            | <b>5</b>   |       |
|-----------------|------------|------------|------------|-------|
|                 | 296 K      | 296 K      | 296 K      | 120 K |
| Mn(1)-N(1)      | 2.143(4)   | 2.222(4)   | 2.119(4)   |       |
| Mn(1)-N(2)      | 2.121(4)   | 2.154(4)   | 2.081(4)   |       |
| Mn(1)-N(3)      | 2.052(3)   | 2.132(4)   | 2.050(4)   |       |
| Mn(1)-N(4)      | 2.037(4)   | 2.066(4)   | 2.018(4)   |       |
| Mn(1)-O(1)      | 1.867(3)   | 1.882(3)   | 1.892(3)   |       |
| Mn(1)-O(2)      | 1.881(3)   | 1.879(3)   | 1.878(3)   |       |
| N(1)-Mn(1)-N(2) | 82.32(16)  | 81.27(15)  | 83.43(16)  |       |
| N(1)-Mn(1)-N(3) | 168.24(16) | 162.27(15) | 166.58(17) |       |
| N(1)-Mn(1)-N(4) | 86.63(15)  | 84.57(15)  | 87.60(16)  |       |
| N(1)-Mn(1)-O(1) | 87.58(13)  | 86.19(14)  | 85.40(14)  |       |
| N(1)-Mn(1)-O(2) | 92.09(14)  | 95.70(14)  | 94.08(15)  |       |
| N(2)-Mn(1)-N(3) | 87.00(15)  | 83.43(15)  | 85.45(17)  |       |
| N(2)-Mn(1)-N(4) | 168.09(15) | 164.02(15) | 169.13(16) |       |
| N(2)-Mn(1)-O(1) | 91.78(14)  | 95.32(15)  | 94.39(15)  |       |
| N(2)-Mn(1)-O(2) | 87.93(14)  | 86.66(14)  | 85.95(15)  |       |
| N(3)-Mn(1)-N(4) | 104.36(15) | 111.64(14) | 104.20(17) |       |
| N(3)-Mn(1)-O(1) | 87.83(12)  | 86.38(14)  | 87.99(15)  |       |
| N(3)-Mn(1)-O(2) | 92.45(13)  | 92.28(14)  | 92.60(16)  |       |
| N(4)-Mn(1)-O(1) | 92.18(13)  | 91.08(14)  | 91.00(15)  |       |
| N(4)-Mn(1)-O(2) | 88.05(13)  | 87.41(14)  | 88.57(15)  |       |
| O(1)-Mn(1)-O(2) | 179.59(13) | 177.46(13) | 179.34(16) |       |

### Continuous Shape Measures (CShM) Analysis:

The structural distortions of the manganese(III) coordination environments were also examined by CShM using the SHAPE program (Tables 2 and S6), where a zero value of the shape factor signifies an ideal octahedral geometry.

Continuous Shape Measures (CShM) analyses were carried out to determine the geometry around the Mn ion. Based on the values obtained, the idealized polyhedron was matched with the actual coordination spheres. The smallest value is symbolic of the proximity of the actual coordination sphere and the idealized polyhedron.

**Table S6:** CShM analysis data for complexes **1 – 5**.

| Complex  | Temp. | Structure |         |              |         |          |
|----------|-------|-----------|---------|--------------|---------|----------|
|          |       | HP - 6    | PPY - 6 | OC - 6       | TPR - 6 | JPPY - 6 |
| <b>1</b> | 296 K | 32.092    | 23.489  | <b>1.732</b> | 9.973   | 26.313   |
|          | 120 K | 32.510    | 26.476  | <b>0.714</b> | 12.335  | 29.634   |
|          | 90 K  | 32.829    | 27.249  | <b>0.433</b> | 13.385  | 30.933   |
| <b>2</b> | 296 K | 32.087    | 22.954  | <b>1.830</b> | 9.832   | 25.797   |
|          | 120 K | 32.201    | 23.532  | <b>1.672</b> | 10.050  | 26.396   |
| <b>3</b> | 296 K | 32.113    | 23.005  | <b>1.686</b> | 10.207  | 25.852   |
|          |       | 32.391    | 22.441  | <b>1.559</b> | 11.038  | 25.346   |
| <b>4</b> | 296 K | 32.543    | 25.522  | <b>0.757</b> | 12.604  | 28.571   |
| <b>5</b> | 296 K | 31.934    | 23.185  | <b>1.716</b> | 9.883   | 26.139   |
|          | 120 K | 32.294    | 25.816  | <b>0.817</b> | 11.817  | 28.913   |

HP – 6: Hexagon (D<sub>6h</sub>), PPY – 6 = Pentagonal pyramid, OC – 6: Octahedron (O<sub>h</sub>), TPR – 6: Trigonal prism (D<sub>3h</sub>), JPPY – 6 = Johnson pentagonal pyramid J<sub>2</sub> (C<sub>5v</sub>)

### Octahedral Distortion Parameters

It is well known that the center metal ion of the SCO material has been significantly distorted from a perfect octahedral geometry during the spin-state switching process, where a more regular structure can be obtained in the LS state in comparison to the HS state. This can be described by the depopulation of antibonding orbitals in the LS state. The octahedral distortion parameters ( $\Sigma$ ,  $\Theta$ ,  $\zeta$ ) have been applied to calculate the magnitude of such distortions around the manganese(III) centers using the OctaDist Program (Tables 2 and 3).<sup>5</sup>

$\Sigma$  is the sum of the deviation from 90° of the 12 *cis*-angles of the MnN<sub>4</sub>O<sub>2</sub> octahedron;  $\Theta$  is the sum of the deviation from 60° of the 24 trigonal angles of the projection of the MnN<sub>4</sub>O<sub>2</sub> octahedron onto the trigonal faces;  $\zeta$  is the distance distortion parameter, which is the sum of deviation from individual Mn-N/O bond distances with respect to the mean metal-ligand bond distance.



**Table S7** Selected Non-covalent cation-anion interactions parameters for **1** and **2**.

| Complex  | Type of interaction                                       | 296 K                 | 90 K                  |
|----------|-----------------------------------------------------------|-----------------------|-----------------------|
| <b>1</b> | N-H...O(ReO <sub>4</sub> <sup>-</sup> )                   | 2.913(6) / 2.938(7) Å | 2.808(5) / 2.911(4) Å |
|          | C <sub>Ph</sub> ...O(ReO <sub>4</sub> <sup>-</sup> )      | 3.160(1) Å            | 3.166(6) Å            |
|          | C <sub>amine</sub> -H...O(ReO <sub>4</sub> <sup>-</sup> ) | 3.397(7) Å            | 3.367(5) Å            |
|          | C <sub>Ph</sub> -H...O(ReO <sub>4</sub> <sup>-</sup> )    | 3.411(7) Å            | 3.321(4) Å            |
|          | C <sub>imine</sub> -H...Cl                                | 3.663(6) Å            | 3.606(6) Å            |
|          | C <sub>Ph</sub> -H...Cl                                   | 3.963(6) Å            | 3.846(4) Å            |
|          | Mn...Mn                                                   | 8.606(1) Å            | 8.432(8) Å            |

| Complex  | Type of interaction                                       | 296 K                 | 120 K                 |
|----------|-----------------------------------------------------------|-----------------------|-----------------------|
| <b>2</b> | N-H...O(ReO <sub>4</sub> <sup>-</sup> )                   | 2.923(5) / 2.948(4) Å | 2.885(7) / 2.945(7) Å |
|          | C <sub>Ph</sub> ...O(ReO <sub>4</sub> <sup>-</sup> )      | 3.189(5) Å            | 3.102(4) Å            |
|          | C <sub>amine</sub> -H...O(ReO <sub>4</sub> <sup>-</sup> ) | 3.405(9) Å            | 3.334(5) Å            |
|          | C <sub>Ph</sub> -H...O(ReO <sub>4</sub> <sup>-</sup> )    | 3.440(1) Å            | 3.456(4) Å            |
|          | C <sub>imine</sub> -H...Br                                | 3.716(6) Å            | 3.668(5) Å            |
|          | C <sub>Ph</sub> -H...Br                                   | 3.981(6) Å            | 3.932(5) Å            |
|          | Mn...Mn                                                   | 8.569(1) Å            | 8.532(1) Å            |

**Table S8** Selected Non-covalent cation-anion interactions parameters for **3**.

| Complex  | Type of interaction                                       | Mn(1)                 | Mn(2)                                       |
|----------|-----------------------------------------------------------|-----------------------|---------------------------------------------|
| <b>3</b> | N-H...O(ReO <sub>4</sub> <sup>-</sup> )                   | 3.139(5) / 3.288(5) Å | 3.005(5) / 3.063(5) Å                       |
|          | C <sub>amine</sub> -H...O(ReO <sub>4</sub> <sup>-</sup> ) | 3.409(6) Å            | 3.355(6) / 3.496(7) / 3.220(6) / 3.592(7) Å |
|          | C <sub>Ph</sub> -H...O(ReO <sub>4</sub> <sup>-</sup> )    | 3.536(7) / 3.573(6) Å | 3.346(5) Å                                  |
|          | C <sub>imine</sub> -H...Cl                                | 3.818(6) Å            | 3.281(6) Å                                  |
|          | C <sub>Ph</sub> ...Cl                                     | 3.352(5) / 3.420(4)   |                                             |
|          | Cl...Cl                                                   | 3.344(2) / 3.424(2) Å | 3.258(2) / 3.344(2) / 3.258(2) / 3.424(2) Å |
|          | Mn...Mn                                                   | 8.569(1) Å            |                                             |

**Table S9** Selected Non-covalent cation-anion interactions parameters for **4**.

| Complex  | Type of interaction                                       | 296 K                 |
|----------|-----------------------------------------------------------|-----------------------|
| <b>4</b> | N-H...O(ReO <sub>4</sub> <sup>-</sup> )                   | 3.403(8) / 2.948(7) Å |
|          | C <sub>Ph</sub> ...O(ReO <sub>4</sub> <sup>-</sup> )      | 3.206(7) Å            |
|          | C <sub>amine</sub> -H...O(ReO <sub>4</sub> <sup>-</sup> ) | 3.571(6) Å            |
|          | C <sub>Ph</sub> -H...O(ReO <sub>4</sub> <sup>-</sup> )    | 3.271(6) Å            |
|          | C...Br                                                    | 3.493(4) Å            |
|          | C <sub>Ph</sub> -H...Br                                   | 3.820(4) Å            |
|          | Br...Br                                                   | 3.530(1) Å            |
|          | Mn...Mn                                                   | 3.595(4) Å            |
|          |                                                           | 8.668(8) Å            |

**Table S10** Selected Non-covalent cation-anion interactions parameters for **5**.

| Complex  | Type of interaction                                       | 296 K                 | 120 K                 |
|----------|-----------------------------------------------------------|-----------------------|-----------------------|
| <b>5</b> | N-H...O(ReO <sub>4</sub> <sup>-</sup> )                   | 2.886(5) / 2.907(4) Å | 2.876(6) / 2.863(6) Å |
|          | C <sub>Ph</sub> ...O(ReO <sub>4</sub> <sup>-</sup> )      | 3.184(9)/3.178(9) Å   | 3.206(8)/3.128(8) Å   |
|          | C <sub>amine</sub> -H...O(ReO <sub>4</sub> <sup>-</sup> ) | 3.521(7)/3.471(7) Å   | 3.418(7) / 3.383(7) Å |
|          | C <sub>Ph</sub> -H...O(ReO <sub>4</sub> <sup>-</sup> )    | 3.495(7) Å            | 3.471(7) Å            |
|          | C <sub>Amine</sub> -H...O(NO <sub>2</sub> )               | 4.390(7) Å            | 4.062(8) Å            |
|          | C <sub>Ph</sub> -H...O(NO <sub>2</sub> )                  | 3.565(8) / 3.262(8) Å | 3.533(8) / 3.286(8) Å |
|          | Mn...Mn                                                   | 8.585(1) Å            | 8.407(1) Å            |

**Table S11** The energy difference between different spin states of the manganese(III) complexes at various temperature. The preferred spin states are obtained from the lowest energy.

| Complex  | Temperature (K) | Energy (eV) |         |         |        | Spin state |
|----------|-----------------|-------------|---------|---------|--------|------------|
|          |                 | Singlet     | Triplet | Quintet | Septed |            |
| <b>1</b> | 90              | 1.15        | 0.00    | 0.73    | 3.51   | Triplet    |
|          | 296             | 1.41        | 0.20    | 0.00    | 2.42   | Quintet    |
| <b>2</b> | 120             | 1.38        | 0.17    | 0.00    | 2.42   | Quintet    |
|          | 296             | 1.44        | 0.25    | 0.00    | 2.30   | Quintet    |
| <b>3</b> | 296             | 1.49        | 0.25    | 0.00    | 2.37   | Quintet    |
| <b>4</b> | 296             | 1.18        | 0.00    | 0.24    | 2.81   | Triplet    |
| <b>5</b> | 120             | 1.23        | 0.00    | 0.39    | 3.25   | Triplet    |
|          | 296             | 1.42        | 0.16    | 0.00    | 2.62   | Quintet    |

**Table S12:** Spin crossover behaviors of [Mn(5Cl-sal<sub>2</sub>-323)](Y) (Y = counter anion) complexes with associated Mn–N/O bond distances

| Complex X                                                                                        | T <sub>1/2</sub> (K) <sup>a</sup>                                                                                            | T (K) <sup>b</sup>              | Mn–O (Å)                                                                                                                   | Mn–N (Å)                                                                                                                                                                             | Spin State                                                                | Ref.      |
|--------------------------------------------------------------------------------------------------|------------------------------------------------------------------------------------------------------------------------------|---------------------------------|----------------------------------------------------------------------------------------------------------------------------|--------------------------------------------------------------------------------------------------------------------------------------------------------------------------------------|---------------------------------------------------------------------------|-----------|
| [Mn(5Cl-sal <sub>2</sub> (323))](ReO <sub>4</sub> )<br><br><b>Y = ReO<sub>4</sub></b>            | T = 147 K<br>gradual and complete                                                                                            | 90<br>120<br>296                | 1.876(2)-1.882(2)<br>1.873(3)-1.878(3)<br>1.866(3)-1.876(3)                                                                | 1.992(3)-2.048(3)<br>2.016(4)-2.101(4)<br>2.092(4)-2.199(4)                                                                                                                          | LS<br>LS/HS<br>HS                                                         | This work |
| [Mn(5Cl-sal <sub>2</sub> -323)](BPh <sub>4</sub> )<br><br><b>Y = BPh<sub>4</sub></b>             | T <sub>1/2</sub> (1) = 168 K<br>T <sub>1/2</sub> (2) = 103 K<br>Two-step and complete                                        | 100<br><br>120<br><br>240       | 1.8753(13)-1.8661(13)<br><br>1.856(4)-1.864(4)<br>1.865(4)-1.861(4)<br><br>1.8650(19)-1.8540(19)                           | 2.0742(18)-2.0808(16)<br>2.0005(17)-2.0085(17)<br><br>2.139(5)-2.121(5)<br>2.047(5)-2.022(5)<br>2.098(5)-2.101(5)<br>2.005(5)-2.018(5)<br><br>2.167(3)-2.179(3)<br>2.060(2)-2.095(3) | LS<br><br>HS]:[LS] (1:1)<br><br>HS                                        | 6         |
| [Mn(5Cl-sal <sub>2</sub> -323)](TCNQ) <sub>1.5</sub> ·2MeCN<br><br><b>Y = TCNQ<sub>1.5</sub></b> | T <sub>1/2</sub> ↓ = 73, T <sub>1/2</sub> ↑ = 123;<br>ΔT <sub>1/2</sub> = 50 hysteretic and abrupt;<br>One step and complete | 100<br>220                      | 1.872(2)–1.884(2)<br><br>1.871(2)–1.881(2)                                                                                 | 2.089(3)–2.222(3)<br><br>2.095(2)–2.220(2)                                                                                                                                           | HS<br>HS                                                                  | 7         |
| [Mn(5-Cl-Sal-323)](NO <sub>3</sub> )<br><br><b>Y = NO<sub>3</sub></b>                            | ~ 200<br>gradual and incomplete                                                                                              | 100<br><br>293                  | 1.8690(12)–1.8737(12)<br>1.8726(12)–1.8767(12)<br><br>1.876(2)<br>1.878(2)–1.879(2)                                        | 2.0695(14)–2.2613(14)<br>2.0628(15)–2.1929 (15)<br><br>2.091(2)–2.244(3)<br>2.100(3)–2.206(3)                                                                                        | HS<br>HS                                                                  | 8         |
| [Mn(5-Cl-Sal-323)]ClO <sub>4</sub><br><br><b>Y = ClO<sub>4</sub></b>                             | >281<br>gradual and incomplete                                                                                               | 100<br><br>260                  | 1.8608(13)<br>1.8787(13)<br><br>1.8641(16)–1.8641(16)<br>1.8726(15)                                                        | 2.1071(16)–2.2201(17)<br>1.9826(17)–2.0484 (18)<br><br>2.1055(19)–2.219(2)                                                                                                           | [HS]:[LS] (1:1)<br>HS                                                     | 8         |
| [Mn(5-Cl-Sal-323)]ReCl <sub>6</sub><br><br><b>Y = ReCl<sub>6</sub></b>                           | gradual and incomplete                                                                                                       | 100 K<br><br>240 K<br><br>300 K | 1.874(2), 1.866(2)<br><br>1.871(2), 1.866(2)<br><br>1.868(2), 1.865(2)<br><br>1.866(2), 1.864(2)<br><br>1.865(2), 1.860(2) | 1.981(2), 2.046(2),<br>2.091(2), 2.201(2)<br><br>1.983(2), 2.053(2),<br>2.098(2), 2.219(2)<br><br>2.004(2), 2.080(2),<br>2.101(2), 2.223(2)                                          | LS Mn(1), HS Mn(2)<br><br>LS Mn(1), HS Mn(2)<br><br>LS/HS Mn(1), HS Mn(2) | 9         |

|  |  |       |                    |                                           |                          |  |
|--|--|-------|--------------------|-------------------------------------------|--------------------------|--|
|  |  | 353 K | 1.864(2), 1.860(2) | 2.039(2), 2.114(3),<br>2.099(2), 2.225(3) | LS/HS Mn(1),<br>HS Mn(2) |  |
|  |  | 403 K |                    | 2.067(2), 2.149(3)<br>2.097(3), 2.233(3)  | LS/HS Mn(1),<br>HS Mn(2) |  |
|  |  | 423 K |                    | 2.071(3), 2.157(3),<br>2.098(3), 2.235(3) | LS/HS Mn(1),<br>HS Mn(2) |  |

a: spin crossover temperature; b: structure analyses temperature; c: TCNQ = 7,7,8,8,-  
tetracyanoquinodimethane

**Table S13:** Spin crossover behaviors of [Mn(5Br-sal<sub>2</sub>-323)](Y) (Y = counter anion) complexes with associated Mn–N/O bond distances

| Complex X                                                                                 | T <sub>1/2</sub> (K) <sup>a</sup>                                                    | T (K) <sup>b</sup>              | Mn–O (Å)                                                                                              | Mn–N (Å)                                                                                              | Spin State                                                              | Ref.          |
|-------------------------------------------------------------------------------------------|--------------------------------------------------------------------------------------|---------------------------------|-------------------------------------------------------------------------------------------------------|-------------------------------------------------------------------------------------------------------|-------------------------------------------------------------------------|---------------|
| [Mn(5Br-sal <sub>2</sub> -323)](ReO <sub>4</sub> )<br><b>Y = ReO<sub>4</sub></b>          | T <sub>1/2</sub> ↑ = 96<br>abrupt and complete                                       | 120<br>296                      | 1.868(4)-1.875(3)<br>1.870(4)-1.874(4)                                                                | 2.071(4)-2.207(5)<br>2.091(5)-2.213(6)                                                                | HS/LS<br>HS                                                             | This work     |
| [Mn(5Br-sal <sub>2</sub> -323)](BPh <sub>4</sub> )<br><b>Y = BPh<sub>4</sub></b>          | T <sub>1/2</sub> (1) = 164 K<br>T <sub>1/2</sub> (2) = 98 K<br>Two-step and complete | 100<br>120<br>240               | 1.868(2)-1.876(2)<br>1.868(2)-1.875(2)<br>1.864(3)-1.867(3)                                           | 1.989(3)-2.061(3)<br>1.997(3)-2.077(3)<br>1.996(4)-2.081(4)                                           | LS<br>LS<br>HS                                                          | <sup>10</sup> |
| [Mn(5Br-sal <sub>2</sub> -323)]NO <sub>3</sub><br><b>Y = NO<sub>3</sub></b>               | HS                                                                                   | 293                             | 1.870(2)-1.875(2)                                                                                     | 2.078(3)-2.243(3)                                                                                     | HS                                                                      | <sup>8</sup>  |
| [Mn(5Br-sal <sub>2</sub> -323)]PF <sub>6</sub><br><b>Y = PF<sub>6</sub></b>               | HS                                                                                   | 293                             | 1.866(3)-1.878(3)                                                                                     | 2.091(3)-2.252(4)                                                                                     | HS                                                                      | <sup>8</sup>  |
| [Mn(5Br-sal <sub>2</sub> -323)]TCNQ <sub>1.5</sub> 2MeCN<br><b>Y = TCNQ<sub>1.5</sub></b> | HS                                                                                   | 100                             | 1.871(4)-1.886(4)                                                                                     | 2.095(5)-2.175(5)                                                                                     | HS                                                                      | <sup>7</sup>  |
| [Mn(5Br-sal <sub>2</sub> -323)]ClO <sub>4</sub><br><b>Y = ClO<sub>4</sub></b>             | ~ 175. Gradual<br>[HS][HS] to<br>[HS][LS]<br>(1:1)                                   | 100<br>294                      | 1.867<br>1.881<br>1.865(3)-1.869(3)                                                                   | 2.110-2.200<br>1.999-2.060<br>2.086(4)-2.184(4)                                                       | HS<br>HS                                                                | <sup>11</sup> |
| [Mn(5Br-sal <sub>2</sub> -323)][Ni(mnt)]<br><b>Y = [Ni(mnt)<sub>2</sub>]</b>              | 380. Gradual<br>[HS](75%) to<br>[LS]                                                 | 123<br>296<br>350<br>400<br>473 | 1.881(3)-1.885(2)<br>1.869(2)-1.878(3)<br>1.881(3)-1.885(2)<br>1.881(3)-1.885(2)<br>1.881(3)-1.885(2) | 1.984(3)-2.048(3)<br>2.020(3)-2.091(3)<br>2.031(3)-2.108(3)<br>2.054(3)-2.145(3)<br>2.065(5)-2.162(5) | LS<br>LS<br>Intermediate spin<br>Intermediate spin<br>Intermediate spin | <sup>12</sup> |

|                                                                                                              |                                      |                                           |                          |                                           |                          |    |
|--------------------------------------------------------------------------------------------------------------|--------------------------------------|-------------------------------------------|--------------------------|-------------------------------------------|--------------------------|----|
| [Mn(5Br-sal <sub>2</sub> -323)]][Pt(mt)]<br><br><b>Y =</b><br>[Pt(mnt) <sub>2</sub> ]                        | 380. Gradual<br>[HS](75%) to<br>[LS] | 123                                       | 1.887(4)–1.889(4)        | 1.975(4)–2.055(4)                         | LS                       | 12 |
|                                                                                                              |                                      | 296                                       | 1.876(3)–1.883(3)        | 2.011(4)–2.088(4)                         | LS                       |    |
|                                                                                                              |                                      | 350                                       | 1.880(3)–1.886(3)        | 2.025(3)–2.102(4)                         | Intermediate spin        |    |
|                                                                                                              |                                      | 400                                       | 1.874(3)–1.882(3)        | 2.054(4)–2.135(5)                         | Intermediate spin        |    |
|                                                                                                              |                                      | 473                                       | 1.874(3)–1.891(3)        | 2.054(4)–2.154(5)                         | Intermediate spin        |    |
| [Mn(5Br-sal <sub>2</sub> -323)][Ni(dmi)<br>·CH <sub>3</sub> CN<br><br><b>Y =</b><br>[Ni(dmit) <sub>2</sub> ] | HS                                   | 296                                       | 1.866(2)–1.872(2)        | 2.101(3)–2.262(4)                         | HS                       | 12 |
| [Mn(5-Br-Sal-323)]ReCl <sub>6</sub><br><br><b>Y = ReCl<sub>6</sub></b>                                       | gradual and<br>incomplete            | 100 K                                     | 1.871(2), 1.864(2)       | 1.985(3), 2.045(3),<br>2.095(3), 2.193(3) | LS Mn(1), HS<br>Mn(2)    | 9  |
|                                                                                                              |                                      | 240 K                                     | 1.872(2), 1.863(2)       | 1.989(2), 2.053(2),<br>2.100(2), 2.213(3) | LS Mn(1), HS<br>Mn(2)    |    |
|                                                                                                              |                                      | 300 K                                     | 1.873(2), 1.860(2)       | 2.014(3), 2.087(3),<br>2.099(3), 2.218(3) | LS/HS Mn(1), HS<br>Mn(2) |    |
|                                                                                                              |                                      | 353 K                                     | 1.864(2), 1.862(2)       | 2.046(3), 2.122(3),<br>2.099(3), 2.222(3) | LS/HS Mn(1), HS<br>Mn(2) |    |
|                                                                                                              |                                      | 403 K                                     | 1.862(3), 1.858(2)       | 2.069(3), 2.149(4),<br>2.096(3), 2.220(4) | LS/HS Mn(1), HS<br>Mn(2) |    |
| 423 K                                                                                                        | 1.860(3), 1.863(3)                   | 2.072(4), 2.154(4),<br>2.100(4), 2.222(4) | LS/HS Mn(1),<br>HS Mn(2) |                                           |                          |    |

a: spin crossover temperature; b: structure analyses temperature

**Table S14:** Spin crossover behaviors of [Mn(3,5Cl-sal<sub>2</sub>-323)](Y) (Y = counter anion) complexes with associated Mn–N/O bond distances

| Complex X                                                                                 | T <sub>1/2</sub> (K) <sup>a</sup>                                                                                                                                                                                                                                  | T (K) <sup>b</sup>            | Mn–O (Å)                                                                                                                                                                                                                                    | Mn–N (Å)                                                                                                                                                                                                                                    | Spin State                                                  | Ref.          |
|-------------------------------------------------------------------------------------------|--------------------------------------------------------------------------------------------------------------------------------------------------------------------------------------------------------------------------------------------------------------------|-------------------------------|---------------------------------------------------------------------------------------------------------------------------------------------------------------------------------------------------------------------------------------------|---------------------------------------------------------------------------------------------------------------------------------------------------------------------------------------------------------------------------------------------|-------------------------------------------------------------|---------------|
| [Mn(3,5Cl-sal <sub>2</sub> (323))](ReO <sub>4</sub> )<br><b>Y = ReO<sub>4</sub></b>       | T <sub>1/2</sub> ↑ = 104<br>abrupt and incomplete<br>[HS] to [HS][LS]<br>(1:1)                                                                                                                                                                                     | 296                           | 1.877(3)-1.876(3)                                                                                                                                                                                                                           | 2.102(4)-2.231(5)                                                                                                                                                                                                                           | HS                                                          | This work     |
| [Mn(3,5Cl-sal <sub>2</sub> (323))](BPh <sub>4</sub> )<br><b>Y = BPh<sub>4</sub></b>       | T <sub>1/2</sub> ↓ = 139<br>T <sub>1/2</sub> ↑ = 140<br>ΔT= 1 K<br>hysteretic and abrupt<br>[HS][HS] to [HS][LS]<br>(intermediate state)<br>T <sub>1/2</sub> ↓ = 83<br>T <sub>1/2</sub> ↑ = 86<br>ΔT= 3 K<br>hysteretic and abrupt<br>[HS][LS] ~ (1:1) to [LS][LS] | 250<br>150<br>115<br>82<br>10 | 1.869(3)-1.872(3)<br>1.871(2)-1.872(2)<br>1.866(2)-1.875(2)<br>1.871(4)-1.881(4)<br>1.874(4)-1.880(4)<br>1.864(4)-1.875(4)<br>1.864(4)-1.876(4)<br>1.864(10)-1.883(10)<br>1.876(10)-1.877(10)<br>1.864(10)-1.883(10)<br>1.876(10)-1.877(10) | 2.088(3)-2.225(3)<br>2.079(3)-2.240(3)<br>2.090(3)-2.234(3)<br>2.017(5)-2.120(5)<br>2.034(5)-2.141(6)<br>2.081(5)-2.242(5)<br>2.091(5)-2.239(7)<br>1.967(11)-2.067(11)<br>1.987(12)-2.089(11)<br>1.967(11)-2.067(11)<br>1.987(12)-2.089(11) | HS<br>HS<br>Intermediate state<br>LS<br>LS                  | <sup>13</sup> |
| [Mn(3,5 Cl-sal <sub>2</sub> -323)]ClO <sub>4</sub> ·0.5MeOH<br><b>Y = ClO<sub>4</sub></b> | ~ 240<br>Gradual and incomplete                                                                                                                                                                                                                                    | 174                           | 1.872(2)–1.877(2)                                                                                                                                                                                                                           | 1.980(3)–2.058(3)                                                                                                                                                                                                                           | LS                                                          | <sup>8</sup>  |
| [Mn(3,5Cl-sal <sub>2</sub> -323)]NO <sub>3</sub> ·EtOH<br><b>Y = NO<sub>3</sub></b>       | ~ 260<br>Gradual and incomplete                                                                                                                                                                                                                                    | 293<br>100                    | 1.879(19)–1.887(18)<br>1.8709(14)–1.8815(14)                                                                                                                                                                                                | 2.013(2)–2.104(2)<br>1.9852(17)–2.0448(17)                                                                                                                                                                                                  | Mostly LS<br>LS                                             | <sup>8</sup>  |
| [Mn(3,5Cl-sal <sub>2</sub> -323)]NTf <sub>2</sub><br><b>Y = NTf<sub>2</sub></b>           | ~ 260.<br>Gradual<br>[HS][LS] ~ (3:1) to [HS][LS] ~ (1:1)<br>T <sub>1/2</sub> ↓ = 157<br>T <sub>1/2</sub> ↑ = 171<br>ΔT= 14 K (5 K/min)<br>hysteretic and abrupt<br>[HS][LS] ~ (1:1) to [LS]                                                                       | 260<br>210<br>185<br>120      | 1.881(3)–1.884(3)<br>1.885(2)–1.887(2)<br>1.8833(17)-1.8906(17)<br>1.8801(17)–1.8818(17)<br>1.888(3)                                                                                                                                        | 2.065(4)–2.168(4)<br>2.037(3)–2.132(3)<br>2.001(2)–2.0738(19)<br>2.081(2)–2.189(2)<br>1.993(3)–2.065(4)                                                                                                                                     | Mostly HS<br>Intermediate state<br>Intermediate state<br>LS | <sup>14</sup> |

|                                                                                         |                         |     |                   |                   |    |    |
|-----------------------------------------------------------------------------------------|-------------------------|-----|-------------------|-------------------|----|----|
| [Mn(3,5Cl-sal <sub>2</sub> (323))](BPh <sub>4</sub> )<br><br><b>Y = BPh<sub>4</sub></b> | T <sub>1/2</sub> = 137  | 240 | 1.871(2)–1.866(2) | 2.085(3)–2.219(3) | LS | 15 |
|                                                                                         | Abrupt                  |     |                   |                   |    |    |
|                                                                                         | HS to HS:LS             | 160 | 1.872(2)–1.864(2) | 2.091(3)–2.228(3) | HS |    |
|                                                                                         | intermediate state 1    |     | 1.866(2)–1.868(2) | 2.077(3)–2.240(3) |    |    |
|                                                                                         | T <sub>1/2</sub> ↓ = 83 |     |                   |                   |    |    |
| T <sub>1/2</sub> ↑ = 91                                                                 | 100                     |     | 1.878(3)–1.869(3) | 2.017(4)–2.088(3) |    |    |
| ΔT= 8 K (5 K/ min)                                                                      |                         |     | 1.880(3)–1.868(3) | 2.018(4)–2.106(4) |    |    |
| hysteretic and                                                                          |                         |     | 1.876(3)–1.858(3) | 2.090(3)–2.111(3) |    |    |
| abrupt                                                                                  |                         |     |                   |                   |    |    |
| HS:LS intermediate                                                                      |                         |     |                   |                   |    |    |
| state 2 to LS                                                                           |                         |     |                   |                   |    |    |

a: spin crossover temperature; b: structure analyses temperature;



**Table S15:** Spin crossover behaviors of [Mn(3,5Br-sal<sub>2</sub>-323)](Y) (Y = counter anion) complexes with associated Mn–N/O bond distances

| Complex X                                                                                                         | T <sub>1/2</sub> (K) <sup>a</sup>                                                                                   | T (K) <sup>b</sup>                   | Mn–O (Å)                                                                                                                                                                                                                                                                                                  | Mn–N (Å)                                                                                                                                                                                                                                                                                              | Spin State | Ref.      |
|-------------------------------------------------------------------------------------------------------------------|---------------------------------------------------------------------------------------------------------------------|--------------------------------------|-----------------------------------------------------------------------------------------------------------------------------------------------------------------------------------------------------------------------------------------------------------------------------------------------------------|-------------------------------------------------------------------------------------------------------------------------------------------------------------------------------------------------------------------------------------------------------------------------------------------------------|------------|-----------|
| [Mn(3,5Br-sal <sub>2</sub> (323))](ReO <sub>4</sub> )<br><b>Y = ReO<sub>4</sub></b>                               | LS                                                                                                                  | 296                                  | 1.867(3)-1.881(3)                                                                                                                                                                                                                                                                                         | 2.037(4)-2.143(4)                                                                                                                                                                                                                                                                                     | LS         | This work |
| [Mn(3,5Br-sal <sub>2</sub> (323))](BPh <sub>4</sub> )<br><b>Y = BPh<sub>4</sub></b>                               | T <sub>1/2</sub> ↓ = 86<br>T <sub>1/2</sub> ↑ = 90<br>ΔT=4 K<br>hysteretic and abrupt<br>[HS][HS] to [HS][LS] (1:1) | 240                                  | 1.858(7)-1.860(7)                                                                                                                                                                                                                                                                                         | 2.059(9)-2.229(10)                                                                                                                                                                                                                                                                                    | HS         | 10        |
| [Mn(3,5Br-sal <sub>2</sub> (323))](BPh <sub>4</sub> )<br><b>Y = BPh<sub>4</sub></b>                               | T <sub>1/2</sub> ↓ = 82<br>T <sub>1/2</sub> ↑ = 90<br>ΔT=8 K<br>hysteretic and abrupt<br>[HS][HS] to [HS][LS] (1:1) | 25<br>83<br>110<br>150<br>250<br>293 | 1.868(14)-1.908(15)<br>1.903(14)-1.880(7)<br>1.862(15)-1.886(16)<br>1.904(15)-1.883(15)<br>1.875(7)-1.892(7)<br>1.880(7)-1.890(7)<br>1.869(7)-1.890(7)<br>1.884(7)-1.888(7)<br>1.868(2)-1.879(2)<br>1.874(2)-1.880(2)<br>1.866(3)-1.879(3)<br>1.874(3)-1.879(3)<br>1.864(3)-1.879(3)<br>1.866(3)-1.876(4) | 2.008(18)-2.08(2)<br>2.064(19)-2.26(2)<br>2.09(2)-2.21(2)<br>1.98(2)-2.080(19)<br>2.002(8)-2.082(9)<br>2.081(10)-2.261(9)<br>2.091(10)-2.252(10)<br>2.018(10)-2.127(10)<br>2.094(3)-2.262(3)<br>2.078(3)-2.126(3)<br>2.090(4)-2.259(4)<br>2.076(4)-2.252(4)<br>2.075(5)-2.232(5)<br>2.079(5)-2.230(5) | HS         | 16        |
| [Mn(3,5Br-sal <sub>2</sub> -323)]ClO <sub>4</sub> ·½MeCN<br><b>Y = ClO<sub>4</sub></b>                            | 75<br>Gradual and incomplete                                                                                        | 100<br>200                           | 1.873(2)–1.877(2)<br>1.869(2)–1.874(2)                                                                                                                                                                                                                                                                    | 1.984(3)–2.054(3)<br>2.024(3)–2.114(3)                                                                                                                                                                                                                                                                | LS<br>LS   | 17        |
| [Mn(3,5Br-sal <sub>2</sub> -323)]BF <sub>4</sub> ·EtOH<br><b>Y = BF<sub>4</sub></b>                               | ~175.<br>Gradual and incomplete                                                                                     | 100<br>293                           | 1.879(3)–1.887(3)<br>1.869(4)–1.881(4)                                                                                                                                                                                                                                                                    | 1.997(5)–2.066(4)<br>2.053(6)–2.179(5)                                                                                                                                                                                                                                                                | LS<br>HS   | 17        |
| [Mn(3,5Br-sal <sub>2</sub> -323)]CF <sub>3</sub> SO <sub>3</sub> ·EtOH<br><b>Y = CF<sub>3</sub>SO<sub>3</sub></b> | ~ 200.<br>Gradual and incomplete                                                                                    | 100<br>293                           | 1.8881(10)–1.8934(10)<br>1.881(2)–1.880(3)                                                                                                                                                                                                                                                                | 1.9863(12)–2.0569(12)<br>2.053(3)–2.166(4)                                                                                                                                                                                                                                                            | LS<br>HS   | 17        |

|                                                                                       |                                 |            |                                         |                                         |          |               |
|---------------------------------------------------------------------------------------|---------------------------------|------------|-----------------------------------------|-----------------------------------------|----------|---------------|
| [Mn(3,5Br-sal <sub>2</sub> -323)]ClO <sub>4</sub> ·EtOH<br><b>Y = ClO<sub>4</sub></b> | >200.<br>Gradual and incomplete | 100<br>293 | 1.870(4)–1.8888(4)<br>1.868(3)–1.882(3) | 2.0009(5)–2.098(5)<br>2.063(5)–2.200(4) | LS<br>HS | <sup>17</sup> |
| [Mn(3,5Br-sal <sub>2</sub> -323)]NO <sub>3</sub> ·EtOH<br><b>Y = NO<sub>3</sub></b>   | >250.<br>Gradual and incomplete | 100        | 1.8820(16)–1.8831(16)                   | 1.982(2)–2.045(2)                       | LS       | <sup>17</sup> |
| [Mn(3,5Br-sal <sub>2</sub> -323)]PF <sub>6</sub> ½·MeOH<br><b>Y = PF<sub>6</sub></b>  | LS                              | 100        | 1.861(2)–1.879(2)                       | 1.980(3)–2.058(3)                       | LS       | <sup>17</sup> |

a: spin crossover temperature; b: structure analyses temperature;

**Table S16:** Spin crossover behaviors of [Mn(5NO<sub>2</sub>-sal<sub>2</sub>-323)](Y) (Y = counter anion) complexes with associated Mn–N/O bond distances

| Complex X                                                                                                                | T <sub>1/2</sub> (K) <sup>a</sup>                                                                                                          | T (K) <sup>b</sup> | Mn–O (Å)                                                                             | Mn–N (Å)                                                                             | Spin State                                               | Ref.      |
|--------------------------------------------------------------------------------------------------------------------------|--------------------------------------------------------------------------------------------------------------------------------------------|--------------------|--------------------------------------------------------------------------------------|--------------------------------------------------------------------------------------|----------------------------------------------------------|-----------|
| [Mn(5NO <sub>2</sub> -sal <sub>2</sub> (323))](ReO <sub>4</sub> )<br><b>Y = ReO<sub>4</sub></b>                          | T = 115<br>Gradual and complete                                                                                                            | 120<br>296         | 1.878(3)–1.892(3)<br>1.879(3)- 1.882(3)                                              | 2.018(4)–2.119(4)<br>2.066(4)–2.222(4)                                               | LS<br>HS                                                 | This work |
| [Mn(5NO <sub>2</sub> -sal <sub>2</sub> (323))](AsF <sub>6</sub> )<br><b>Y = AsF<sub>6</sub></b>                          | T <sub>1/2</sub> ↑ = 317<br>gradual<br>[HS][HS] to [HS][LS] (1:1)<br><br>T <sub>1/2</sub> ↑ = 164<br>gradual<br>[HS][LS] (1:1) to [LS][LS] | 100<br>300         | 1.881(5)-1.882(5)<br>1.891(4)-1.891(5)<br><br>1.874(5)-1.892(5)<br>1.891(4)-1.892(5) | 1.992(6)-2.065(7)<br>1.983(5)-2.044(6)<br><br>2.043(6)-2.220(7)<br>2.010(6)-2.090(6) | LS<br>LS<br><br>Intermediate state<br>Intermediate state | 18        |
| [Mn(5NO <sub>2</sub> -sal <sub>2</sub> (323))](SbF <sub>6</sub> )<br><b>Y = SbF<sub>6</sub></b>                          | T <sub>1/2</sub> ↑ = 305<br>gradual<br><br>T <sub>1/2</sub> ↑ = 131<br>gradual<br>[HS][HS] to [HS][LS] (1:1)                               | 100<br>300         | 1.882(3)-1.892(3)<br>1.892(3)-1.894(3)<br><br>1.867(4)-1.883(4)<br>1.877(4)-1.881(4) | 2.023(4)-2.184(4)<br>1.992(4)-2.052(4)<br><br>2.035(5)-2.216(6)<br>2.007(5)-2.083(5) | LS<br>LS<br><br>Intermediate state<br>Intermediate state | 18        |
| [Mn(5NO <sub>2</sub> -sal <sub>2</sub> -323)]BF <sub>4</sub> ·3H <sub>2</sub> O<br><b>Y = BF<sub>4</sub></b>             | HS                                                                                                                                         | 300                | 1.874(5)-1.892(5)<br>1.891(4)-1.892(5)                                               | 2.080(4)-2.258(5)<br>2.000(4)-2.106(5)                                               | LS<br>HS                                                 | 18        |
| [Mn(5NO <sub>2</sub> -sal <sub>2</sub> -323)]NO <sub>3</sub> ·MeCN·0.5H <sub>2</sub> O<br><b>Y = NO<sub>3</sub></b>      | ~ 200.<br>Gradual and incomplete<br>mostly HS to [HS][LS] (1:1)                                                                            | 100<br>293         | 1.898–1.898<br>1.872–1.878<br><br>1.942–1.957<br>1.871-1.875                         | 1.999–2.047<br>2.080–2.241<br><br>2.018–2.121<br>2.105–2.234                         | Intermediate state<br><br>mostly HS                      | 19        |
| [Mn(5NO <sub>2</sub> -sal <sub>2</sub> -323)]ClO <sub>4</sub> ·MeCN·0.5H <sub>2</sub> O<br><b>Y = ClO<sub>4</sub></b>    | < 200.<br>Gradual and incomplete<br>mostly HS to [HS][LS] (1:1)                                                                            | 100<br>260         | 1.893–1.899<br>1.870–1.876<br><br>1.908–1.919<br>1.875–1.884                         | 1.987–2.046<br>2.063–2.269<br><br>2.014–2.073<br>2.018–2.269                         | Intermediate state<br><br>mostly HS                      | 19        |
| [Mn(5NO <sub>2</sub> -sal <sub>2</sub> -323)]ClO <sub>4</sub> ·0.5MeCN·0.5H <sub>2</sub> O<br><b>Y = ClO<sub>4</sub></b> | HS                                                                                                                                         | 100                | 1.873-1.875                                                                          | 2.103-2.272                                                                          | HS                                                       | 19        |

|                                                                                             |           |     |                            |                             |           |               |
|---------------------------------------------------------------------------------------------|-----------|-----|----------------------------|-----------------------------|-----------|---------------|
| [Mn(5NO <sub>2</sub> -sal <sub>2</sub> -323)]PF <sub>6</sub><br><b>Y = PF<sub>6</sub></b>   | LS        | 100 | 1.882–1.891<br>1.882–1.883 | 1.984–2.046<br>1.990–2.2061 | LS        | <sup>19</sup> |
| [Mn(5NO <sub>2</sub> -sal <sub>2</sub> -323)]OTf<br><b>Y = OTf</b>                          | mostly HS | 100 | 1.864–1.887                | 2.049–2.241                 | mostly HS | <sup>19</sup> |
| [Mn(5NO <sub>2</sub> -sal <sub>2</sub> -323)]BPh <sub>4</sub><br><b>Y = BPh<sub>4</sub></b> | HS        | 100 | 1.872–1.877                | 2.083–2.278                 | HS        | <sup>19</sup> |

a: spin crossover temperature; b: structure analyses temperature;

**Table S17:** Spin crossover behaviors of [Mn(X-sal<sub>2</sub>-323)]ReO<sub>4</sub> (X= ligand substituents) complexes with associated Mn–N/O bond distances

| Complex                                                           | T <sub>1/2</sub> (K) <sup>a</sup>                                                                                                                                                                              | T (K) <sup>b</sup>     | Mn–O (Å)                                                                                                                                                                | Mn–N (Å)                                                                                                                                                                        | Spin State                                                              | Ref.      |
|-------------------------------------------------------------------|----------------------------------------------------------------------------------------------------------------------------------------------------------------------------------------------------------------|------------------------|-------------------------------------------------------------------------------------------------------------------------------------------------------------------------|---------------------------------------------------------------------------------------------------------------------------------------------------------------------------------|-------------------------------------------------------------------------|-----------|
| [Mn(5Cl-sal <sub>2</sub> (323))](ReO <sub>4</sub> )               | T = 147 K<br>gradual and complete                                                                                                                                                                              | 90<br>120<br>296       | 1.876(2)-1.882(2)<br>1.873(3)-1.878(3)<br>1.866(3)-1.876(3)                                                                                                             | 1.992(3)-2.048(3)<br>2.016(4)-2.101(4)<br>2.092(4)-2.199(4)                                                                                                                     | LS<br>LS/HS<br>HS                                                       | This work |
| [Mn(5Br-sal <sub>2</sub> -323)](ReO <sub>4</sub> )                | T <sub>1/2</sub> ↑ = 96<br>abrupt and complete                                                                                                                                                                 | 120<br>296             | 1.868(4)-1.875(3)<br>1.870(4)-1.874(4)                                                                                                                                  | 2.071(4)-2.207(5)<br>2.091(5)-2.213(6)                                                                                                                                          | HS/LS<br>HS                                                             | This work |
| [Mn(3,5Cl-sal <sub>2</sub> (323))](ReO <sub>4</sub> )             | T <sub>1/2</sub> ↑ = 104<br>abrupt and incomplete<br>[HS] to [HS][LS]<br>(1:1)                                                                                                                                 | 296                    | 1.877(3)-1.876(3)                                                                                                                                                       | 2.102(4)-2.231(5)                                                                                                                                                               | HS                                                                      | This work |
| [Mn(3,5Br-sal <sub>2</sub> (323))](ReO <sub>4</sub> )             | LS                                                                                                                                                                                                             | 296                    | 1.867(3)-1.881(3)                                                                                                                                                       | 2.037(4)-2.143(4)                                                                                                                                                               | LS                                                                      | This work |
| [Mn(5NO <sub>2</sub> -sal <sub>2</sub> (323))](ReO <sub>4</sub> ) | T = 115<br>Gradual and complete                                                                                                                                                                                | 120<br>296             | 1.878(3)-1.892(3)<br>1.879(3)-1.882(3)                                                                                                                                  | 2.018(4)-2.119(4)<br>2.066(4)-2.222(4)                                                                                                                                          | LS<br>HS                                                                | This work |
| [Mn(5H-sal <sub>2</sub> -323)](ReO <sub>4</sub> )                 | 84<br>ΔT= 1 K<br>hysteretic and abrupt<br>[HS][LS] (5:3) to Intermediate spin state<br>T <sub>1/2</sub> ↓ = 71<br>T <sub>1/2</sub> ↑ = 77<br>ΔT= 6 K<br>hysteretic and abrupt<br>Intermediate spin state to LS | 10<br>80<br>100<br>250 | 1.878(12)-1.884(12)<br>1.872(12)-1.871(1)<br>1.878(8)-1.874(8)<br>1.875(8)-1.878(9)<br>1.875(9)-1.885(9)<br>1.860(9)-1.869(9)<br>1.875(4)-1.872(4)<br>1.879(4)-1.868(4) | 1.991(14)-2.079(13)<br>1.975(13)-2.062(14)<br>2.051(11)-2.148(10)<br>2.020(12)-2.129(11)<br>1.986(10)-2.066(10)<br>2.065(9)-2.237(10)<br>2.049(4)-2.163(5)<br>2.067(5)-2.213(5) | LS<br><br>Intermediate state<br><br>Intermediate state<br><br>mostly HS | 20**      |

\*\*Please note during our manuscript preparation one Mn(III) system without any substitution on salicylaldehyde ligand [Mn(X-sal<sub>2</sub>-323)](ReO<sub>4</sub>) (X = 5-H,) was published by Dobbelaar *et al* (*Angew. Chem. Int. Ed.* **2022**, *61*, e202114021, reference no 19).

## References

1. T. Degen, M. Sadki, E. Bron, U. König and G. Nénert, *Powder Diffr.*, 2014, **29**, S13-S18.
2. G. M. Sheldrick, SADABS Version 2.03, Bruker Analytical X-Ray Systems, Madison, WI, USA, 2000.
3. O. V. Dolomanov, L. J. Bourhis, R. J. Gildea, J. A. K. Howard and H. Puschmann, *J. Appl. Crystallogr.*, 2009, **42**, 339-341.
4. C. F. Macrae, P. R. Edgington, P. McCabe, E. Pidcock, G. P. Shields, R. Taylor, M. Towler and J. van de Streek, *J. Appl. Crystallogr.*, 2006, **39**, 453-457.
5. R. Ketkaew, Y. Tantirungrotechai, P. Harding, G. Chastanet, P. Guionneau, M. Marchivie and D. J. Harding, *Dalton Trans.*, 2021, **50**, 1086-1096.
6. S. Ghosh, S. Bagchi, M. Das, S. Kamilya and A. Mondal, *Dalton Trans.*, 2020, **49**, 14776-14780.
7. A. V. Kazakova, A. V. Tiunova, D. V. Korchagin, G. V. Shilov, E. B. Yagubskii, V. N. Zverev, S. C. Yang, J. Y. Lin, J. F. Lee, O. V. Maximova and A. N. Vasiliev, *Chemistry*, 2019, **25**, 10204-10213.
8. B. Gildea, L. C. Gavin, C. A. Murray, H. Müller-Bunz, C. J. Harding and G. G. Morgan, *Supramol Chem*, 2012, **24**, 641-653.
9. A. V. Tiunova, A. V. Kazakova, D. V. Korchagin, G. V. Shilov, S. M. Aldoshin, A. I. Dmitriev, M. V. Zhidkov, K. V. Zakharov and E. B. Yagubskii, *Journal*, 2022, **23**.
10. S. Ghosh, S. Bagchi, S. Kamilya and A. Mondal, *Dalton Trans.*, 2021, **50**, 4634-4642.
11. S. Wang, M. Ferbinteanu, C. Marinescu, A. Dobrinescu, Q. D. Ling and W. Huang, *Inorg. Chem.*, 2010, **49**, 9839-9851.
12. Y. Chen, F. Cao, R. M. Wei, Y. Zhang, Y. Q. Zhang and Y. Song, *Dalton Trans.*, 2014, **43**, 3783-3791.
13. V. B. Jakobsen, E. Trzop, E. Dobbelaar, L. C. Gavin, S. Chikara, X. Ding, M. Lee, K. Esien, H. Müller-Bunz, S. Felton, E. Collet, M. A. Carpenter, V. S. Zapf and G. G. Morgan, *J. Am. Chem. Soc.*, 2022, **144**, 195-211.
14. A. J. Fitzpatrick, E. Trzop, H. Müller-Bunz, M. M. Dirtu, Y. Garcia, E. Collet and G. G. Morgan, *Chem Commun (Camb)*, 2015, **51**, 17540-17543.
15. A. V. Tiunova, A. V. Kazakova, D. V. Korchagin, G. V. Shilov, L. V. Zorina, S. V. Simonov, K. V. Zakharov, A. N. Vasiliev and E. B. Yagubskii, *Chemistry*, 2021, **27**, 17609-17619.
16. V. B. Jakobsen, E. Trzop, L. C. Gavin, E. Dobbelaar, S. Chikara, X. Ding, K. Esien, H. Müller-Bunz, S. Felton, V. S. Zapf, E. Collet, M. A. Carpenter and G. G. Morgan, *Angew. Chem. Int. Ed.*, 2020, **59**, 13305-13312.
17. K. Pandurangan, B. Gildea, C. Murray, C. J. Harding, H. Müller-Bunz and G. G. Morgan, *Chem. Eur. J.*, 2012, **18**, 2021-2029.
18. S.-Z. Zhao, Z.-M. Yu, C.-Y. Qin, P.-Y. Xu, Y.-T. Wang, Y.-H. Li and S. Wang, *Inorganica Chimica Acta*, 2022, **538**.
19. I. A. Kühne, L. C. Gavin, M. Harris, B. Gildea, H. Müller-Bunz, M. Stein and G. G. Morgan, *J. Appl. Phys.*, 2021, **129**.
20. E. Dobbelaar, V. B. Jakobsen, E. Trzop, M. Lee, S. Chikara, X. Ding, H. Müller-Bunz, K. Esien, S. Felton, M. A. Carpenter, E. Collet, G. G. Morgan and V. S. Zapf, 2022, **61**, e202114021.
